# Supplementary material
Source: PubMed Central journal article supplement (PMC5878140)

## Supplemental Data 2.

Developmental toxicity profiles, logistic model output, calculated EC values, and logistic regression curves for the 25 test chemicals. Each page represents an individual test chemical. Developmental toxicity for the 24 uniquely measured endpoints at 24 or 120 hpf are shown in the top panel. The Left-bottom panel indicates the model output from logistic regression of the binarized data for any observed morbidity or mortality by 120 hpf. Right bottom panel indicates the calculated EC values and the logistic regression curves of the fitted data.

Abbreviations: MO24, 24 hpf mortality; DP24, 24 hpf developmental delay; SM24; 24 hpf somites; NC24, 24 hpf notochord; MORT, 120 hpf mortality; YSE\_, 120 hpf yolk sac edema; AXIS, 120 hpf axis; EYE\_; 120 hpf eye; SNOU, 120 hpf snout; JAW\_, 120 hpf jaw; OTIC, 120 hpf otic vesicle; PE\_, 120 hpf pericardial edema; BRAI, 120 hpf brain; PFIC, 120 hpf pectoral fin; CFIN, 120 hpf caudal fin; PIG\_, 120 hpf pigmentation; CIRC, 120 hpf circulation; TRUN, 120 hpf truncation; SWIM, 120 hpf swim bladder; NC\_, 120 hpf notochord; TR\_, 120 hpf touch response; DNC\_, not counted due to technical or other error during sampling; ANY, summation of any morbidity or mortality effect

## 5a\_dihydrotestosterone

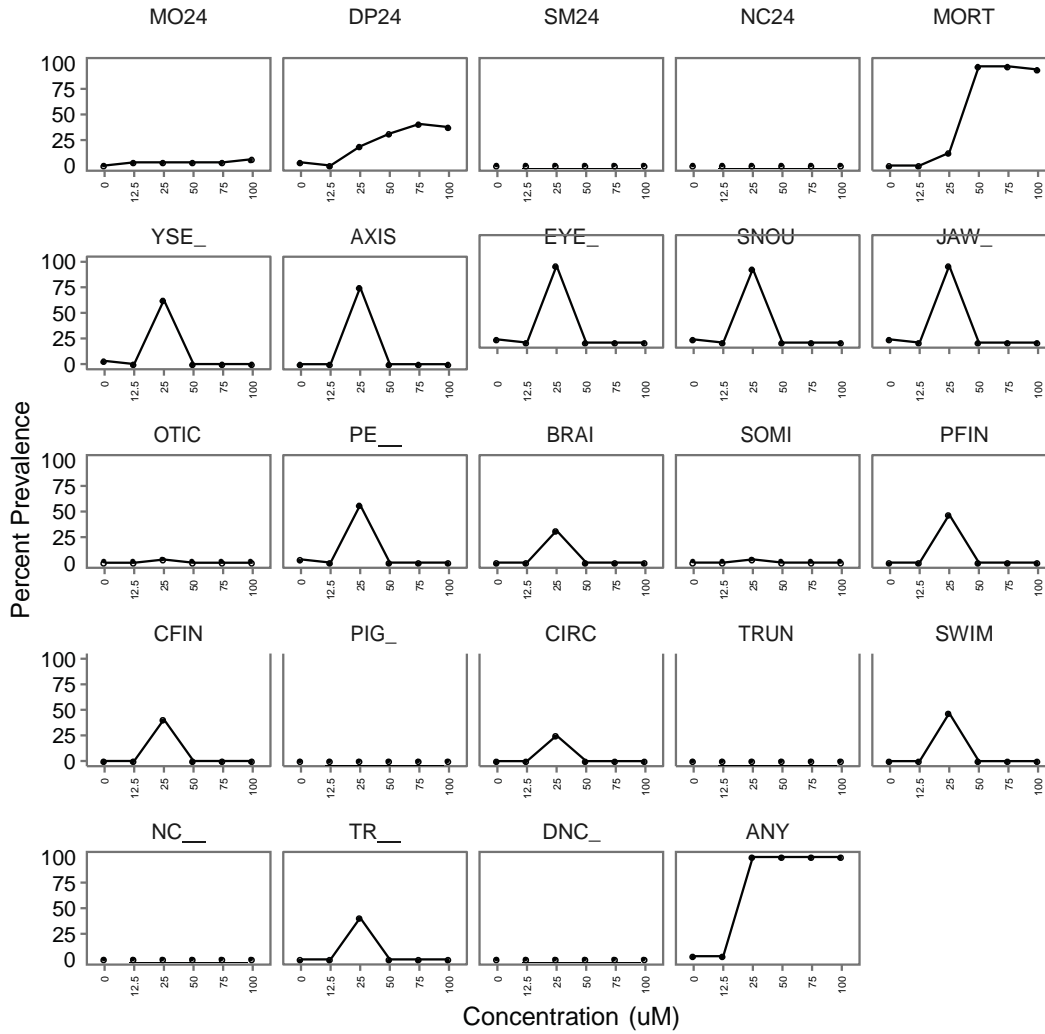

### Model Output:

Call:  
`glm(formula = ANY ~ CONC, family = binomial("logit"), data = logit_df)`

Deviance Residuals:  
 Min 1Q Median 3Q Max  
 -0.4420 -0.0259 0.0000 0.0008 3.9997

Coefficients:  
 Estimate Std. Error z value Pr(>|z|)  
 (Intercept) -7.99842 1.56751 -5.103 3.35e-07 \*\*\*  
 CONC 0.45774 0.09398 4.871 1.11e-06 \*\*\*

---  
 Signif. codes: 0 '\*\*\*' 0.001 '\*\*' 0.01 '\*' 0.05 '.' 0.1 ' ' 1

(Dispersion parameter for binomial family taken to be 1)

Null deviance: 241.555 on 191 degrees of freedom  
 Residual deviance: 28.834 on 190 degrees of freedom  
 AIC: 32.834

Number of Fisher Scoring iterations: 10

### EC Values:

|          | Concentration | SE       |
|----------|---------------|----------|
| p = 0.5: | 17.47358      | 1.195250 |
| p = 0.6: | 18.35937      | 1.261757 |
| p = 0.7: | 19.32461      | 1.358456 |
| p = 0.8: | 20.50211      | 1.503608 |

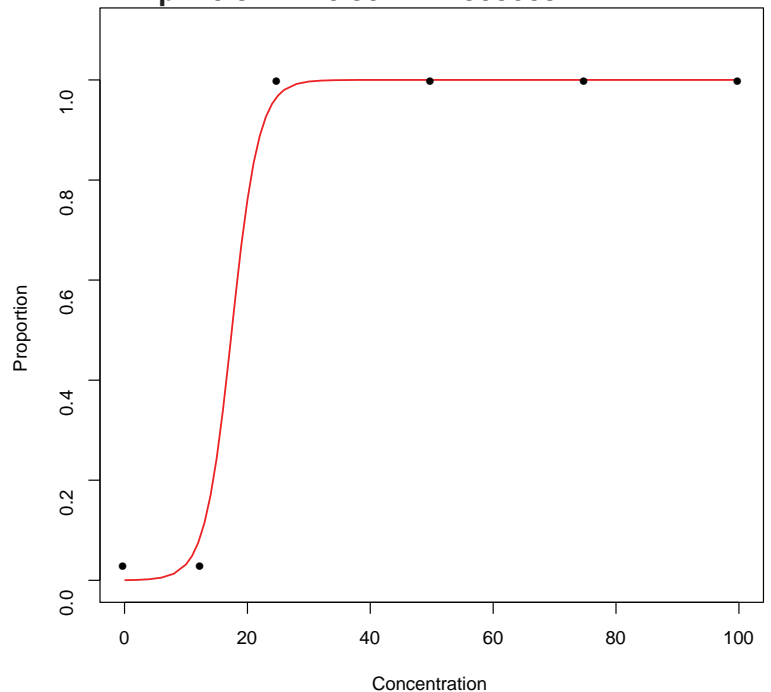

## 17\_methyltestosterone

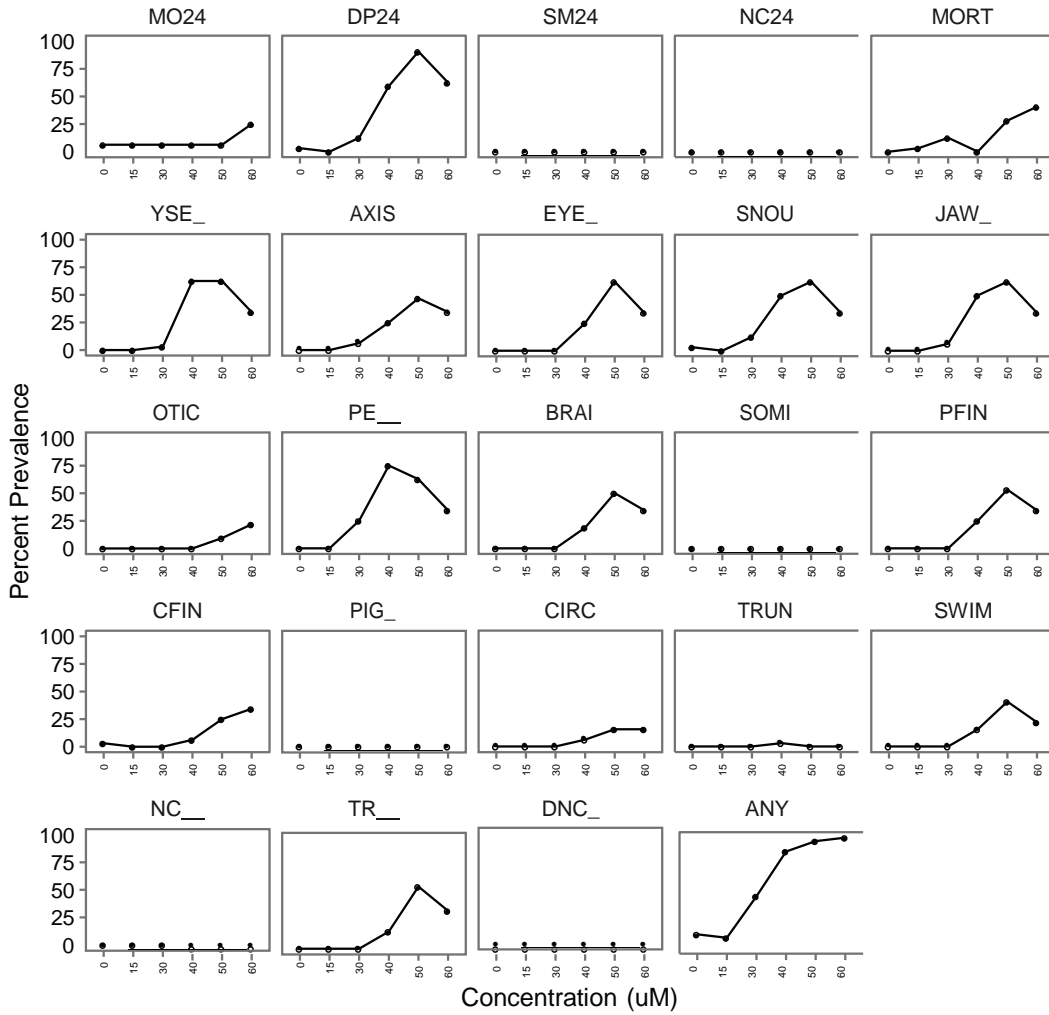

### Model Output:

Call:  
`glm(formula = ANY ~ CONC, family = binomial("logit"), data = logit_df)`

Deviance Residuals:  
 Min 1Q Median 3Q Max  
 -2.3849 -0.6199 0.1884 0.6218 2.6239

Coefficients:  
 Estimate Std. Error z value Pr(>|z|)  
 (Intercept) -3.41001 0.54660 -6.239 4.42e-10 \*\*\*  
 CONC 0.12388 0.01668 7.426 1.12e-13 \*\*\*

---  
 Signif. codes: 0 '\*\*\*' 0.001 '\*\*' 0.01 '\*' 0.05 '.' 0.1 ' ' 1

(Dispersion parameter for binomial family taken to be 1)

Null deviance: 260.12 on 191 degrees of freedom  
 Residual deviance: 131.97 on 190 degrees of freedom  
 AIC: 135.97

Number of Fisher Scoring iterations: 5

### EC Values:

|          | Concentration | SE       |
|----------|---------------|----------|
| p = 0.5: | 27.52669      | 1.818322 |
| p = 0.6: | 30.79973      | 1.792332 |
| p = 0.7: | 34.36635      | 1.884816 |
| p = 0.8: | 38.71730      | 2.142905 |

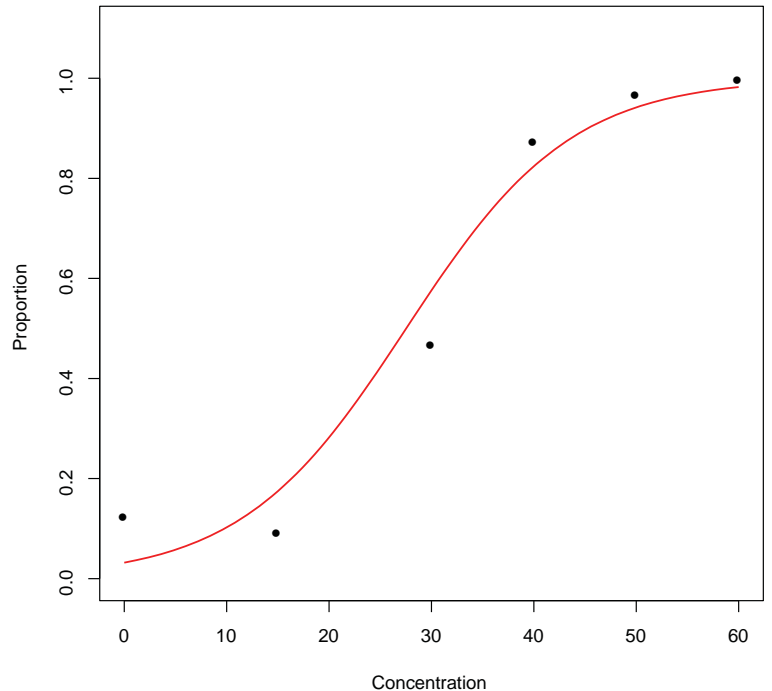

## 17a\_ethinylestradiol

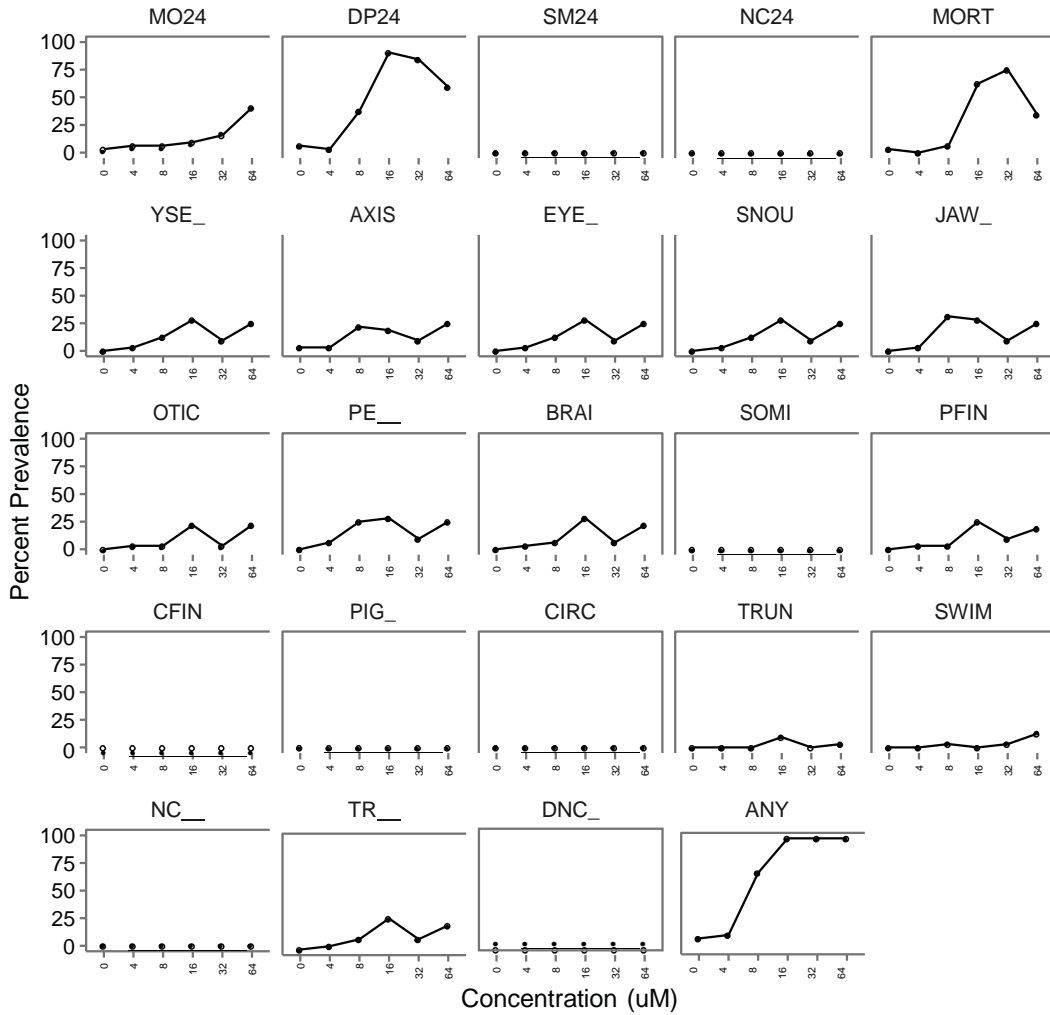

### Model Output:

Call:  
`glm(formula = ANY ~ CONC, family = binomial("logit"), data = logit_df)`

Deviance Residuals:  
 Min 1Q Median 3Q Max  
 -1.4726 -0.2772 0.0000 0.1426 2.5606

Coefficients:  
 Estimate Std. Error z value Pr(>|z|)  
 (Intercept) -3.23983 0.59880 -5.411 6.28e-08 \*\*\*  
 CONC 0.48892 0.08969 5.451 5.00e-08 \*\*\*

---  
 Signif. codes: 0 '\*\*\*' 0.001 '\*\*' 0.01 '\*' 0.05 '.' 0.1 ' ' 1

(Dispersion parameter for binomial family taken to be 1)

Null deviance: 248.371 on 191 degrees of freedom  
 Residual deviance: 88.311 on 190 degrees of freedom  
 AIC: 92.311

Number of Fisher Scoring iterations: 9

### EC Values:

|          | Concentration | SE        |
|----------|---------------|-----------|
| p = 0.5: | 6.626547      | 0.5579331 |
| p = 0.6: | 7.455861      | 0.6087623 |
| p = 0.7: | 8.359558      | 0.6985086 |
| p = 0.8: | 9.461989      | 0.8399172 |

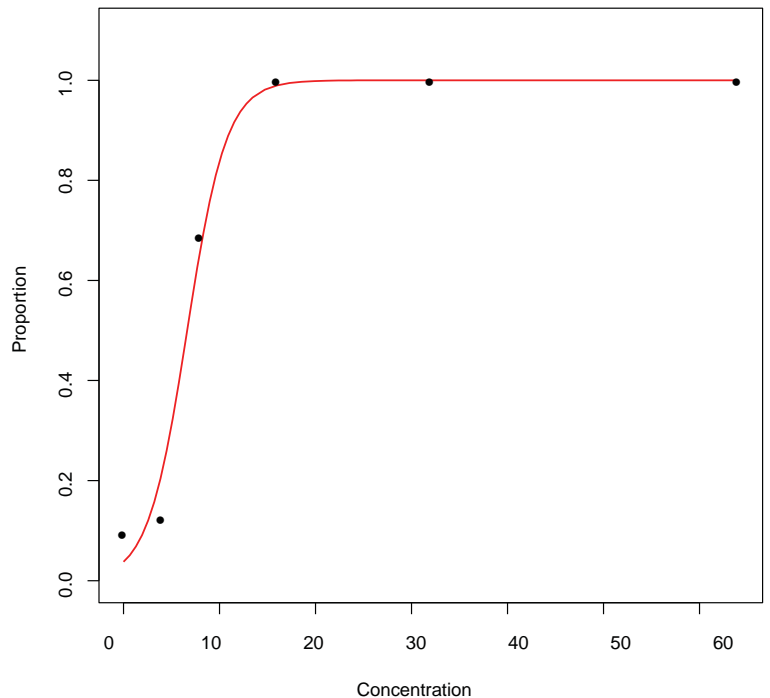

## 17b\_estradiol

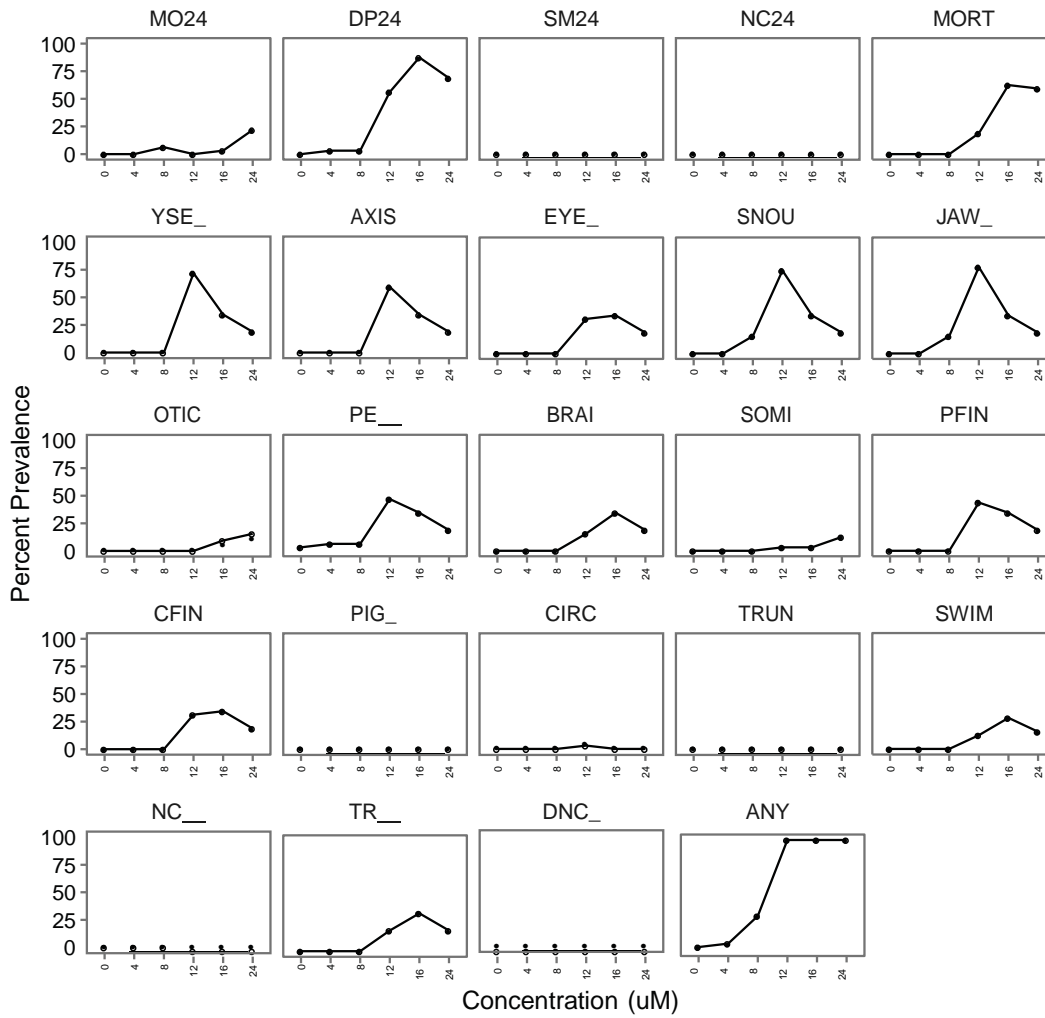

### Model Output:

Call:  
`glm(formula = ANY ~ CONC_log, family = binomial("logit"), data = logit_df)`

Deviance Residuals:  
 Min 1Q Median 3Q Max  
 -1.51390 -0.11850 0.07363 0.41304 3.15034

Coefficients:  
 Estimate Std. Error z value Pr(>|z|)  
 (Intercept) -4.9553 0.9283 -5.338 9.40e-08 \*\*\*  
 CONC\_log 5.9929 0.9984 6.002 1.94e-09 \*\*\*  
 ---  
 Signif. codes: 0 '\*\*\*' 0.001 '\*\*' 0.01 '\*' 0.05 '.' 0.1 ' ' 1

(Dispersion parameter for binomial family taken to be 1)

Null deviance: 248.37 on 191 degrees of freedom  
 Residual deviance: 107.13 on 190 degrees of freedom  
 AIC: 111.13

Number of Fisher Scoring iterations: 6

### EC Values:

|          | Concentration | SE.log     |
|----------|---------------|------------|
| p = 0.5: | 7.856496      | 0.05616197 |
| p = 0.6: | 8.596602      | 0.05370714 |
| p = 0.7: | 9.473682      | 0.05470802 |
| p = 0.8: | 10.652897     | 0.06080110 |

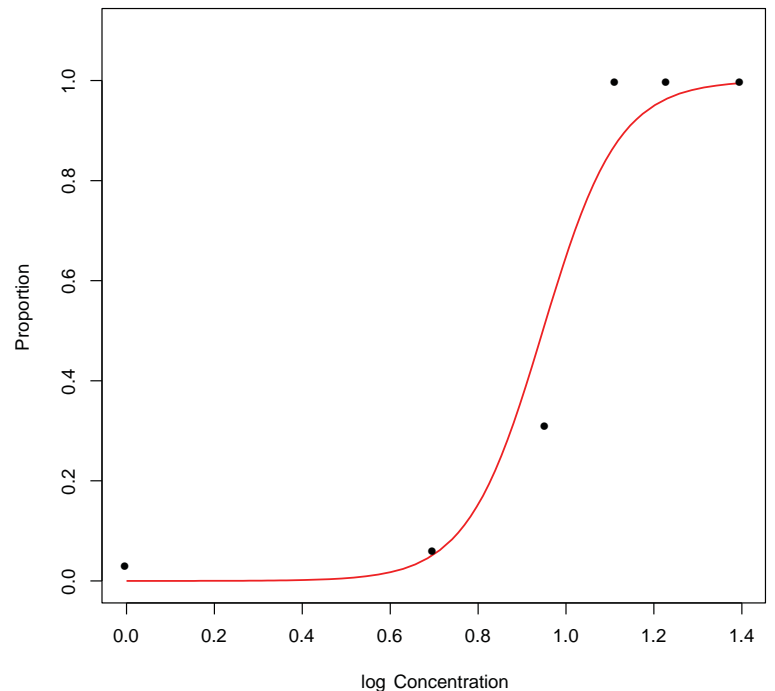

## abamectin

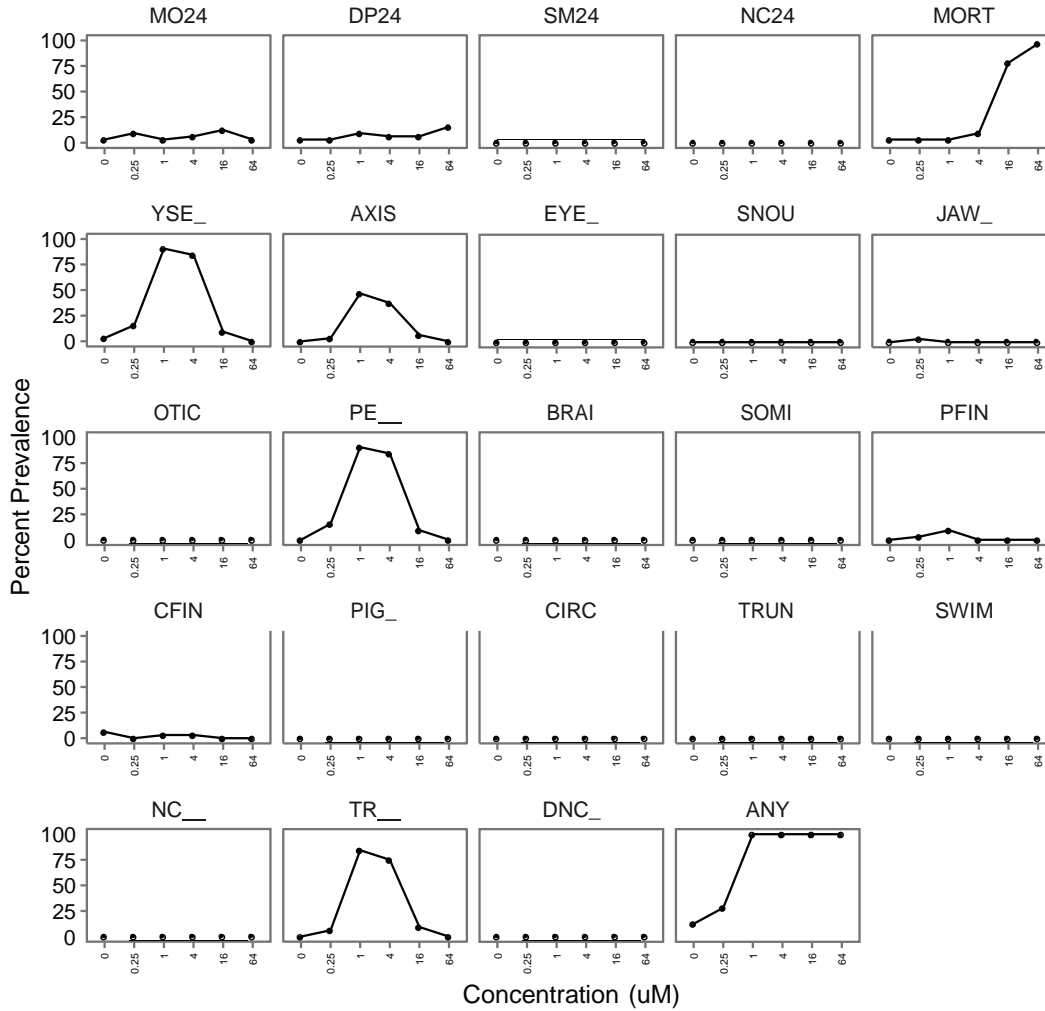

### Model Output:

Call:  
`glm(formula = ANY ~ CONC_log, family = binomial("logit"), data = logit_df)`

Deviance Residuals:  
 Min 1Q Median 3Q Max  
 -0.94613 -0.38387 0.00002 0.00378 2.29985

Coefficients:  
 Estimate Std. Error z value Pr(>|z|)  
 (Intercept) -2.5710 0.5097 -5.044 4.57e-07 \*\*\*  
 CONC\_log 20.6295 4.3423 4.751 2.03e-06 \*\*\*  
 ---  
 Signif. codes: 0 '\*\*\*' 0.001 '\*\*' 0.01 '\*' 0.05 '.' 0.1 ' ' 1

(Dispersion parameter for binomial family taken to be 1)

Null deviance: 222.282 on 191 degrees of freedom  
 Residual deviance: 65.881 on 190 degrees of freedom  
 AIC: 69.881

Number of Fisher Scoring iterations: 9

### EC Values:

|          | Concentration | SE.log     |
|----------|---------------|------------|
| p = 0.5: | 0.3323731     | 0.03877618 |
| p = 0.6: | 0.3940567     | 0.04372087 |
| p = 0.7: | 0.4645288     | 0.05080763 |
| p = 0.8: | 0.5553399     | 0.06103778 |

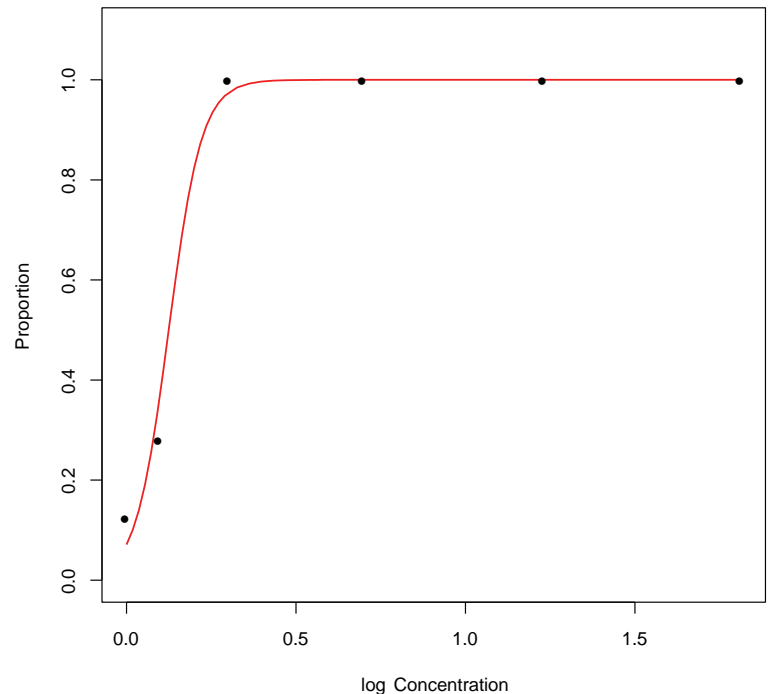

## Bisphenol\_A

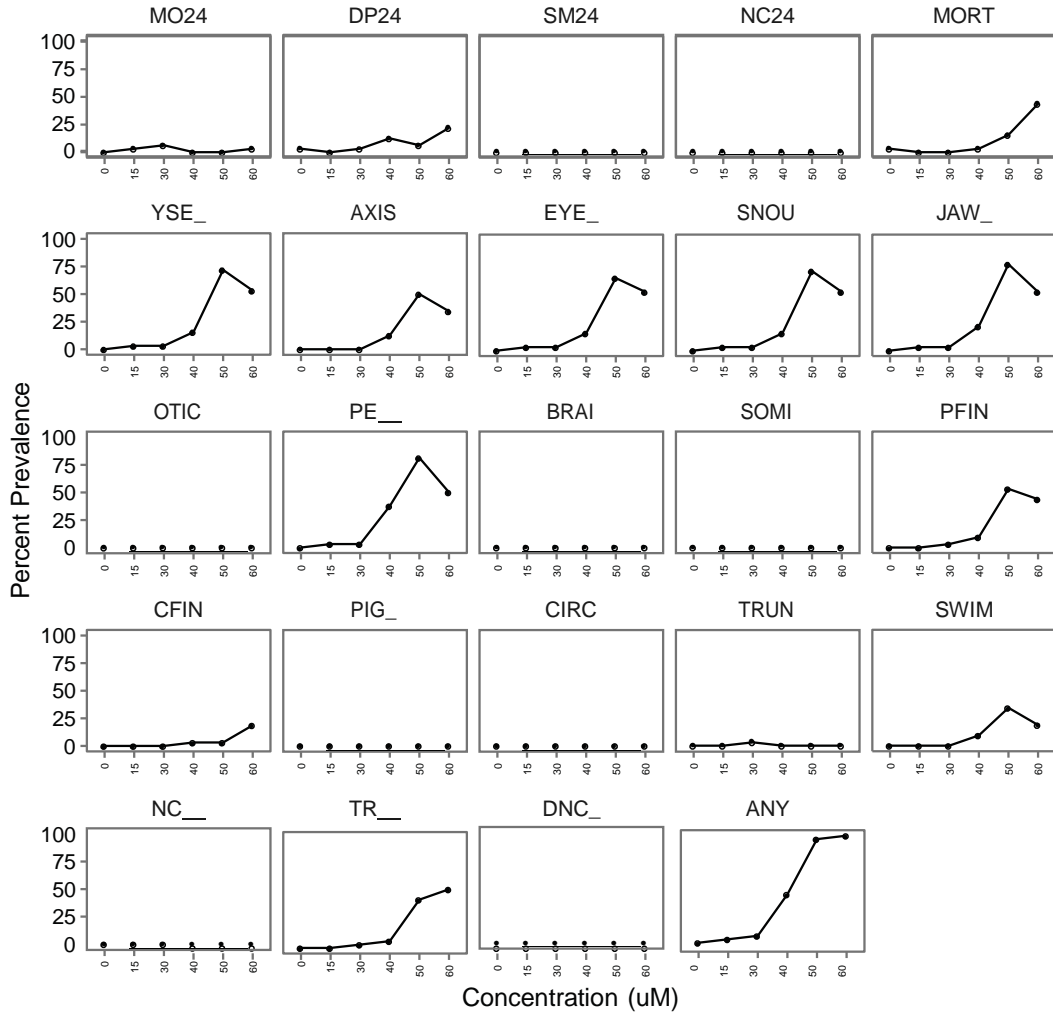

### Model Output:

Call:  
`glm(formula = ANY ~ CONC_log, family = binomial("logit"), data = logit_df)`

Deviance Residuals:  
 Min 1Q Median 3Q Max  
 -1.7626 -0.2432 -0.0008 0.6894 5.4841

Coefficients:  

|             | Estimate | Std. Error | z value | Pr(> z )     |
|-------------|----------|------------|---------|--------------|
| (Intercept) | -15.038  | 2.560      | -5.875  | 4.23e-09 *** |
| CONC_log    | 9.577    | 1.588      | 6.029   | 1.65e-09 *** |

---  
 Signif. codes: 0 '\*\*\*' 0.001 '\*\*' 0.01 '\*' 0.05 '.' 0.1 ' ' 1

(Dispersion parameter for binomial family taken to be 1)

Null deviance: 263.16 on 191 degrees of freedom  
 Residual deviance: 147.20 on 190 degrees of freedom  
 AIC: 151.2

Number of Fisher Scoring iterations: 7

### EC Values:

|          | Concentration | SE.log     |
|----------|---------------|------------|
| p = 0.5: | 36.16904      | 0.05221240 |
| p = 0.6: | 39.97500      | 0.05026920 |
| p = 0.7: | 44.56738      | 0.05433598 |
| p = 0.8: | 50.87221      | 0.06630027 |

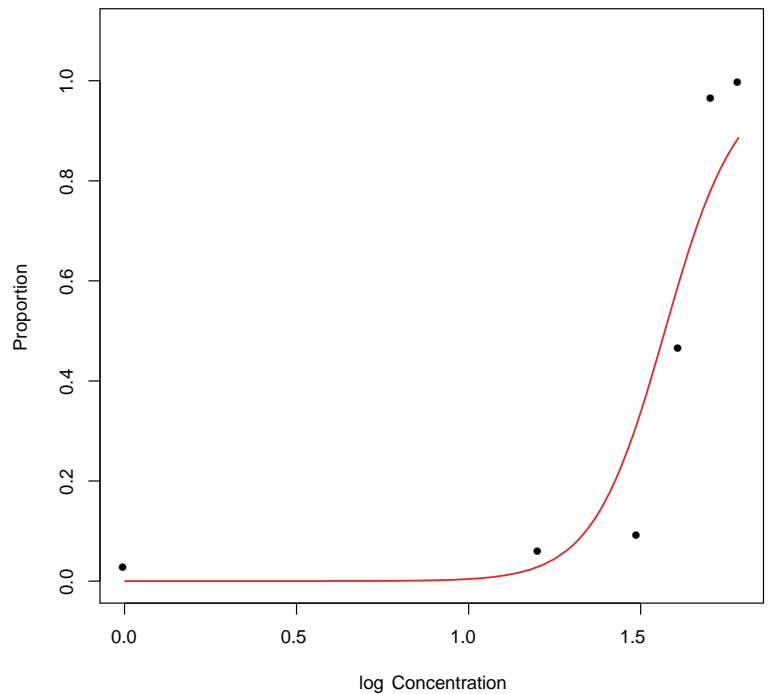

## Bisphenol\_AF

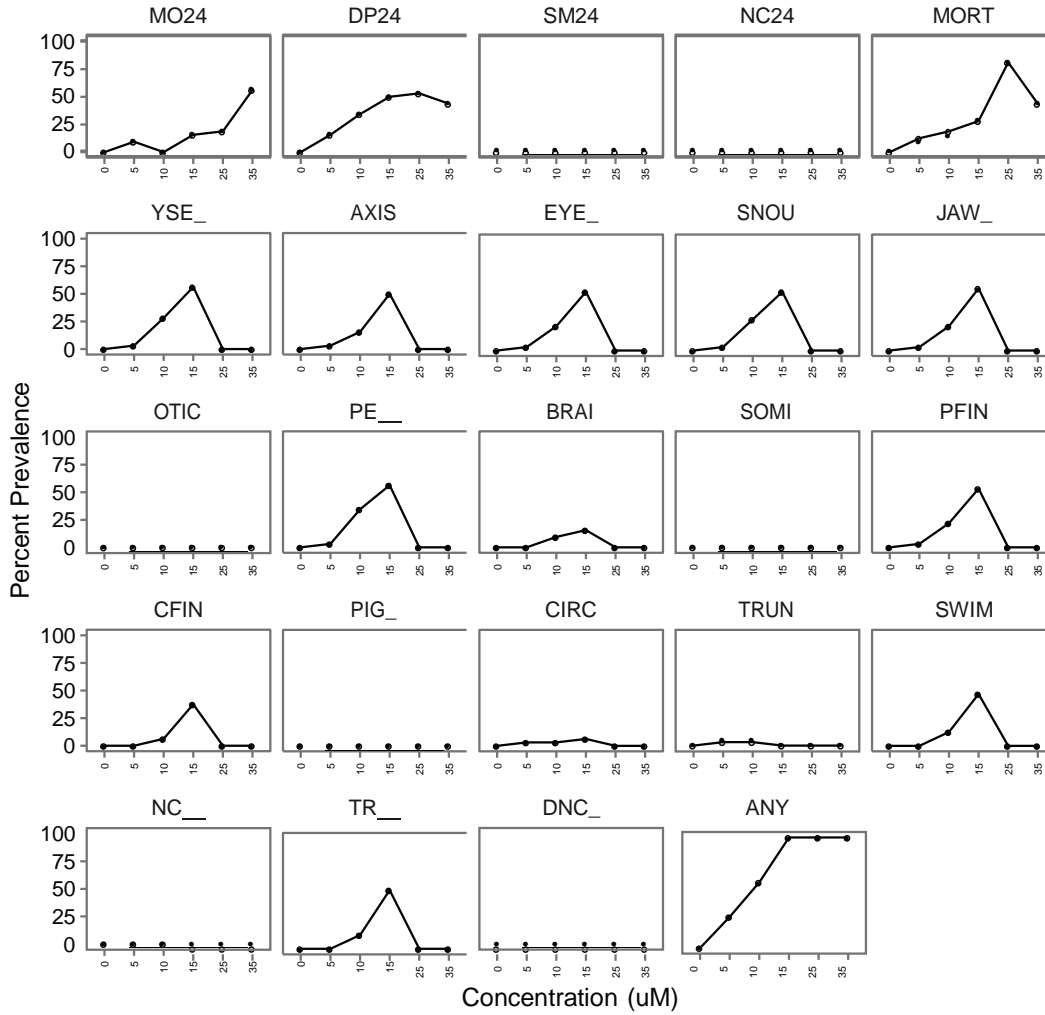

### Model Output:

Call:  
`glm(formula = ANY ~ CONC_log, family = binomial("logit"), data = logit_df)`

Deviance Residuals:  
 Min 1Q Median 3Q Max  
 -1.65862 -0.02165 0.07961 0.38597 1.75674

Coefficients:  
 Estimate Std. Error z value Pr(>|z|)  
 (Intercept) -8.358 1.471 -5.684 1.32e-08 \*\*\*  
 CONC\_log 9.067 1.479 6.131 8.72e-10 \*\*\*  
 ---  
 Signif. codes: 0 '\*\*\*' 0.001 '\*\*' 0.01 '\*' 0.05 '.' 0.1 ' ' 1

(Dispersion parameter for binomial family taken to be 1)

Null deviance: 249.595 on 191 degrees of freedom  
 Residual deviance: 91.381 on 190 degrees of freedom  
 AIC: 95.381

Number of Fisher Scoring iterations: 7

### EC Values:

|          | Concentration | SE.log     |
|----------|---------------|------------|
| p = 0.5: | 7.352511      | 0.07359671 |
| p = 0.6: | 8.258394      | 0.07032117 |
| p = 0.7: | 9.357744      | 0.07172202 |
| p = 0.8: | 10.877113     | 0.08000540 |

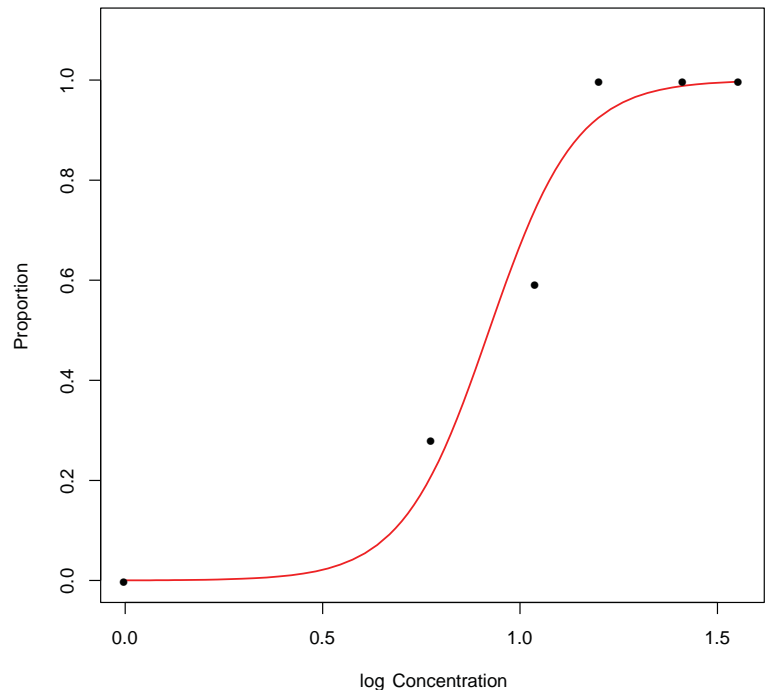



## butylparaben

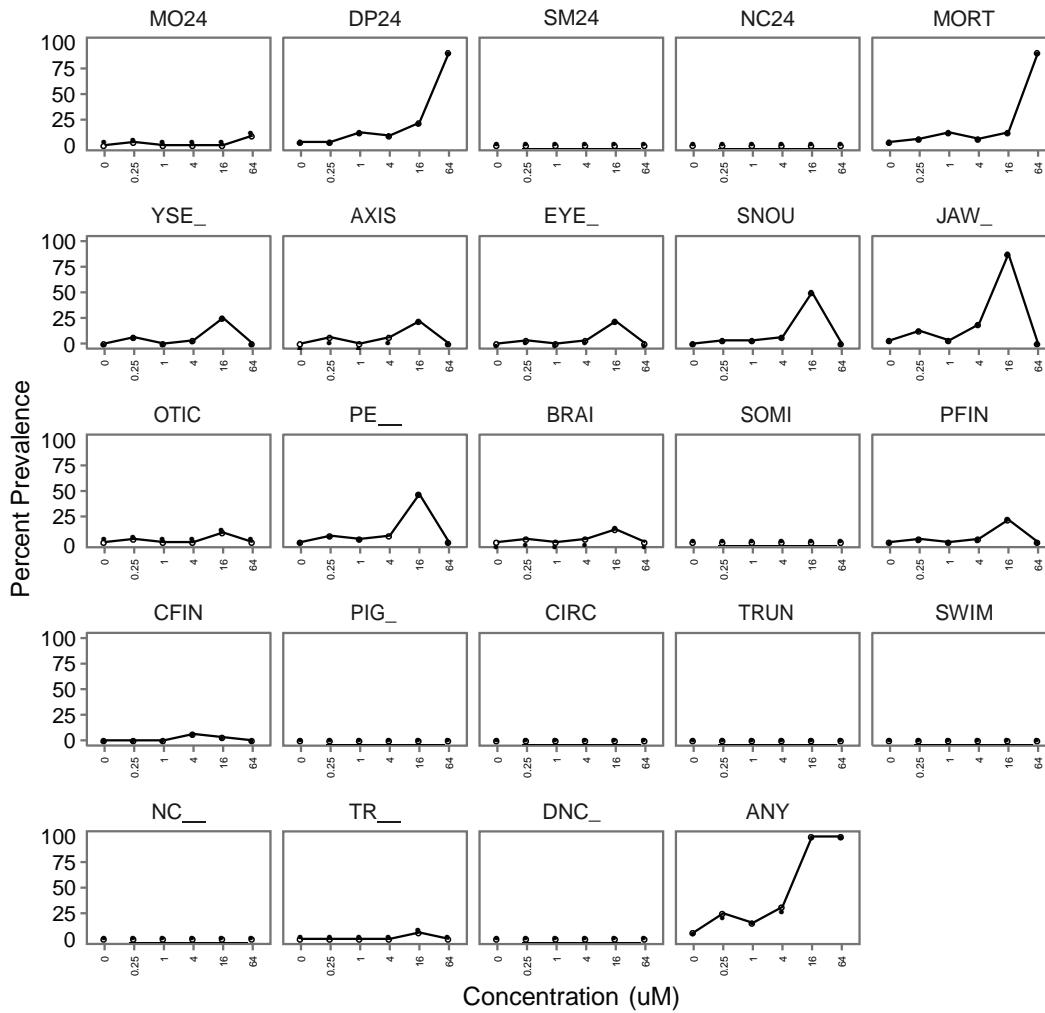

### Model Output:

Call:  
`glm(formula = ANY ~ CONC_log, family = binomial("logit"), data = logit_df)`

Deviance Residuals:  
 Min 1Q Median 3Q Max  
 -1.2279 -0.6605 -0.3842 0.4670 2.2990

Coefficients:  

|             | Estimate | Std. Error | z value | Pr(> z )     |
|-------------|----------|------------|---------|--------------|
| (Intercept) | -2.5689  | 0.3577     | -7.181  | 6.90e-13 *** |
| CONC_log    | 3.8442   | 0.5195     | 7.400   | 1.37e-13 *** |

---  
 Signif. codes: 0 '\*\*\*' 0.001 '\*\*' 0.01 '\*' 0.05 '.' 0.1 ' ' 1

(Dispersion parameter for binomial family taken to be 1)

Null deviance: 265.15 on 191 degrees of freedom  
 Residual deviance: 138.62 on 190 degrees of freedom  
 AIC: 142.62

Number of Fisher Scoring iterations: 5

### EC Values:

|          | Concentration | SE.log    |
|----------|---------------|-----------|
| p = 0.5: | 3.658728      | 0.1443856 |
| p = 0.6: | 4.939393      | 0.1587761 |
| p = 0.7: | 6.738862      | 0.1821907 |
| p = 0.8: | 9.687784      | 0.2188184 |

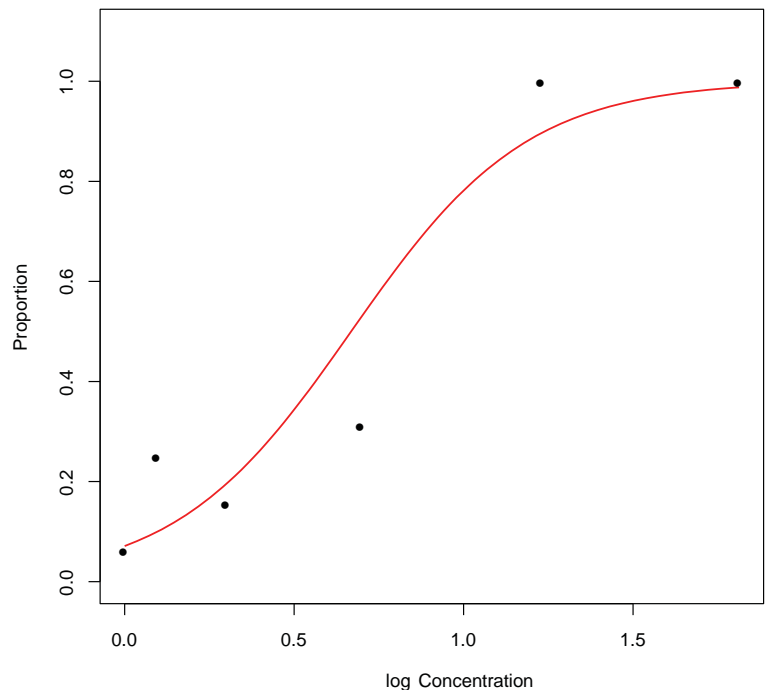

# CP-634384

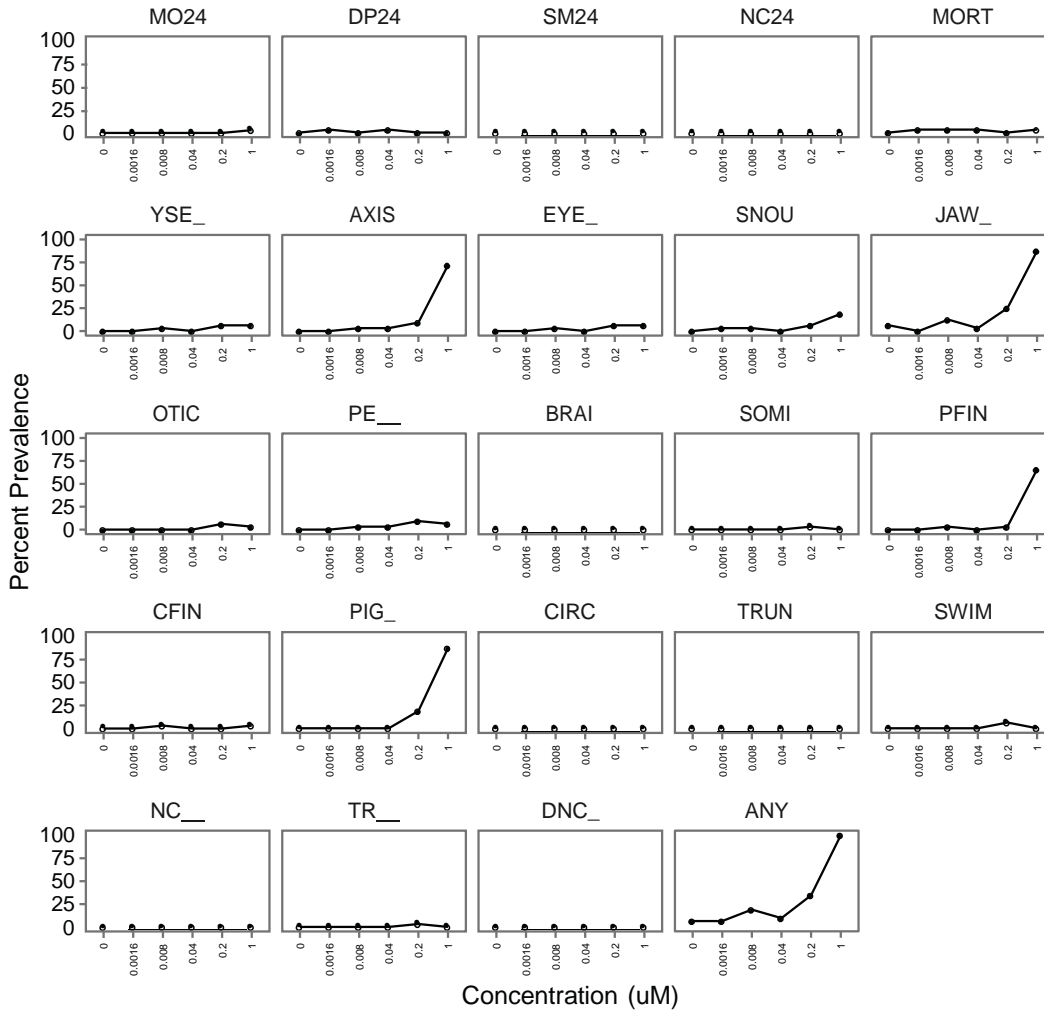

## Model Output:

Call:  
`glm(formula = ANY ~ CONC_log, family = binomial("logit"), data = logit_df)`

Deviance Residuals:  
 Min 1Q Median 3Q Max  
 -0.9697 -0.5092 -0.4242 0.1328 2.2218

Coefficients:  
 Estimate Std. Error z value Pr(>|z|)  
 (Intercept) -2.3796 0.2983 -7.977 1.50e-15 \*\*\*  
 CONC\_log 23.6075 4.7844 4.934 8.04e-07 \*\*\*  
 ---  
 Signif. codes: 0 '\*\*\*' 0.001 '\*\*' 0.01 '\*' 0.05 '.' 0.1 ' ' 1

(Dispersion parameter for binomial family taken to be 1)

Null deviance: 231.80 on 191 degrees of freedom  
 Residual deviance: 126.14 on 190 degrees of freedom  
 AIC: 130.14

Number of Fisher Scoring iterations: 6

## EC Values:

|          | Concentration | SE.log     |
|----------|---------------|------------|
| p = 0.5: | 0.2612395     | 0.03699463 |
| p = 0.6: | 0.3121177     | 0.04384646 |
| p = 0.7: | 0.3698991     | 0.05186088 |
| p = 0.8: | 0.4438436     | 0.06214655 |

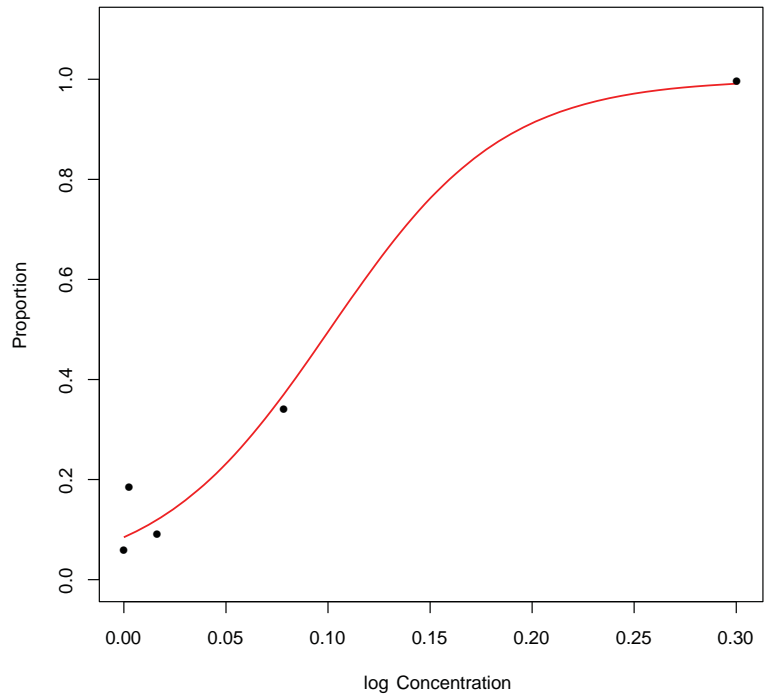

## Diisobutyl\_phtalate

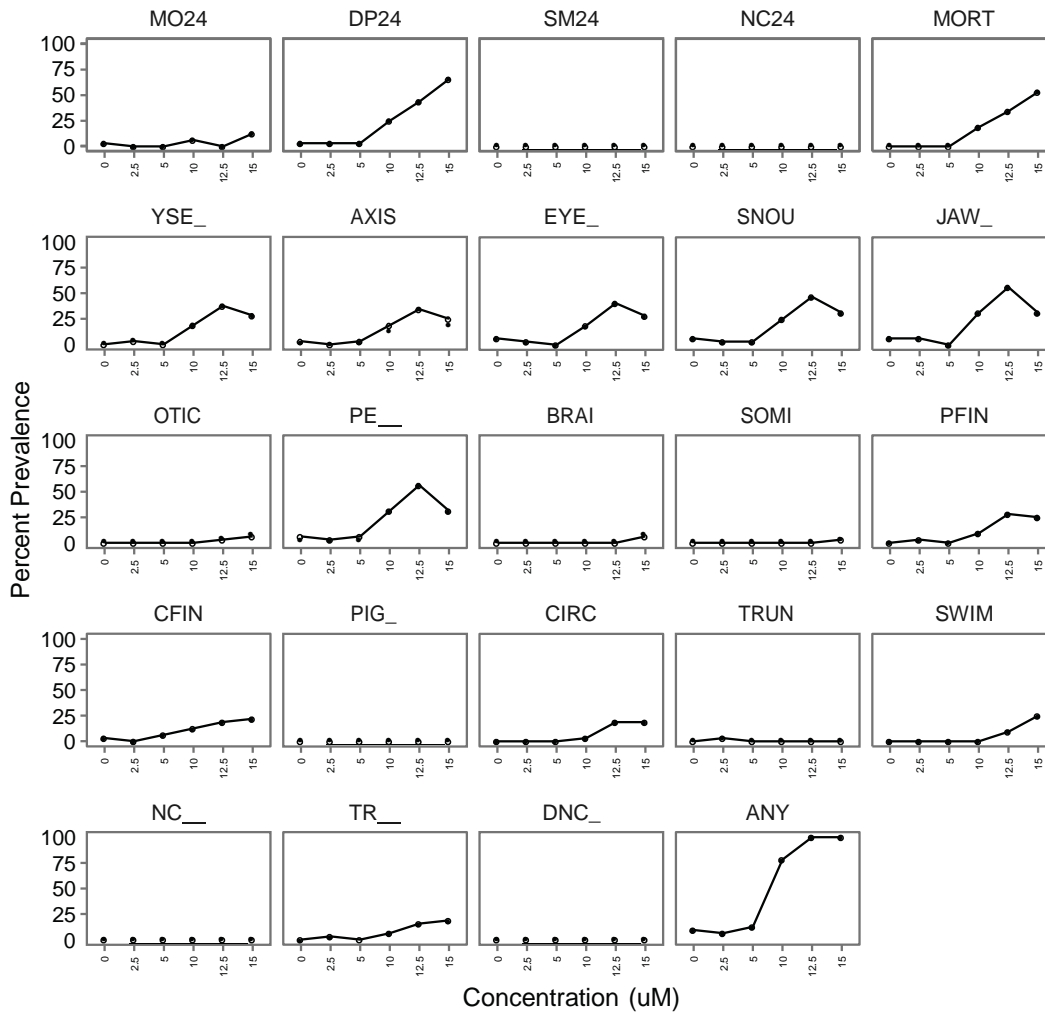

### Model Output:

Call:  
`glm(formula = ANY ~ CONC, family = binomial("logit"), data = logit_df)`

Deviance Residuals:  
 Min 1Q Median 3Q Max  
 -1.8456 -0.3776 0.1691 0.3319 2.8259

Coefficients:  

|             | Estimate | Std. Error | z value | Pr(> z )     |
|-------------|----------|------------|---------|--------------|
| (Intercept) | -3.97413 | 0.55447    | -7.167  | 7.65e-13 *** |
| CONC        | 0.54763  | 0.06859    | 7.984   | 1.42e-15 *** |

---  
 Signif. codes: 0 '\*\*\*' 0.001 '\*\*' 0.01 '\*' 0.05 '.' 0.1 ' ' 1

(Dispersion parameter for binomial family taken to be 1)

Null deviance: 266.09 on 191 degrees of freedom  
 Residual deviance: 104.57 on 190 degrees of freedom  
 AIC: 108.57

Number of Fisher Scoring iterations: 6

### EC Values:

|          | Concentration | SE        |
|----------|---------------|-----------|
| p = 0.5: | 7.256982      | 0.4708762 |
| p = 0.6: | 7.997385      | 0.4823395 |
| p = 0.7: | 8.804197      | 0.5139485 |
| p = 0.8: | 9.788435      | 0.5746450 |

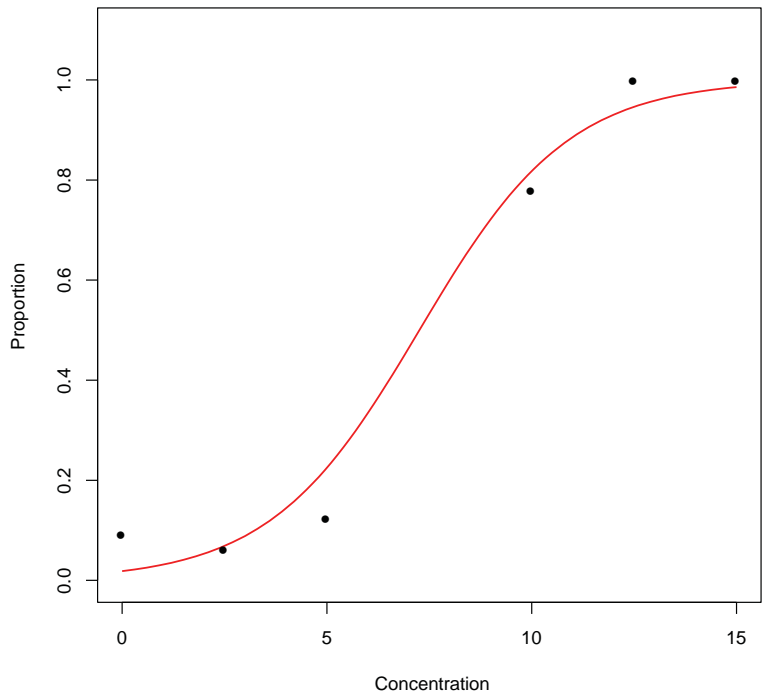

## Dimethipin

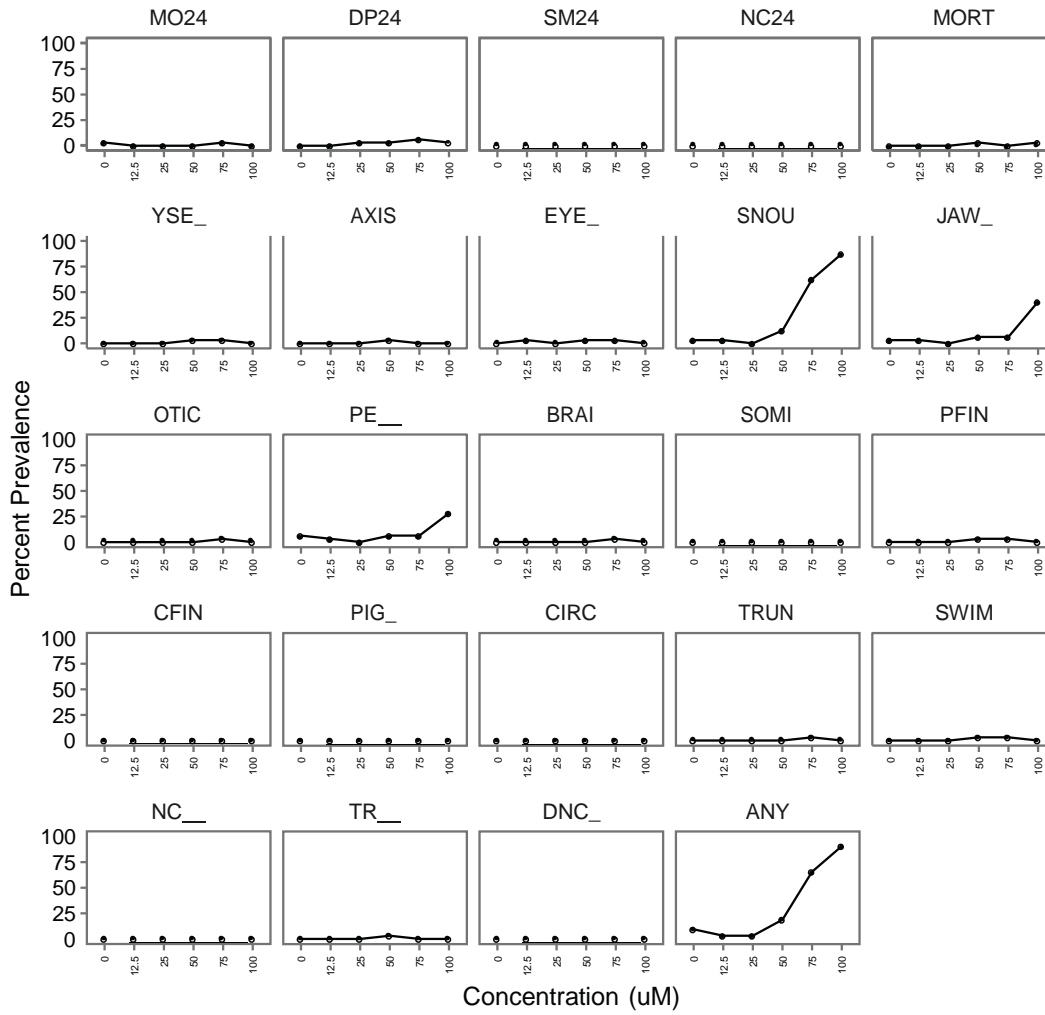

### Model Output:

Call:  
`glm(formula = ANY ~ CONC, family = binomial("logit"), data = logit_df)`

Deviance Residuals:  
 Min 1Q Median 3Q Max  
 -2.0517 -0.4032 -0.2814 0.5098 2.8175

Coefficients:  

|             | Estimate  | Std. Error | z value | Pr(> z )     |
|-------------|-----------|------------|---------|--------------|
| (Intercept) | -3.949975 | 0.533689   | -7.401  | 1.35e-13 *** |
| CONC        | 0.059248  | 0.008045   | 7.364   | 1.78e-13 *** |

---  
 Signif. codes: 0 '\*\*\*' 0.001 '\*\*' 0.01 '\*' 0.05 '.' 0.1 ' ' 1

(Dispersion parameter for binomial family taken to be 1)

Null deviance: 240.05 on 191 degrees of freedom  
 Residual deviance: 137.65 on 190 degrees of freedom  
 AIC: 141.65

Number of Fisher Scoring iterations: 5

### EC Values:

|          | Concentration | SE       |
|----------|---------------|----------|
| p = 0.5: | 66.66883      | 3.741229 |
| p = 0.6: | 73.51239      | 4.047338 |
| p = 0.7: | 80.96977      | 4.576616 |
| p = 0.8: | 90.06711      | 5.412083 |

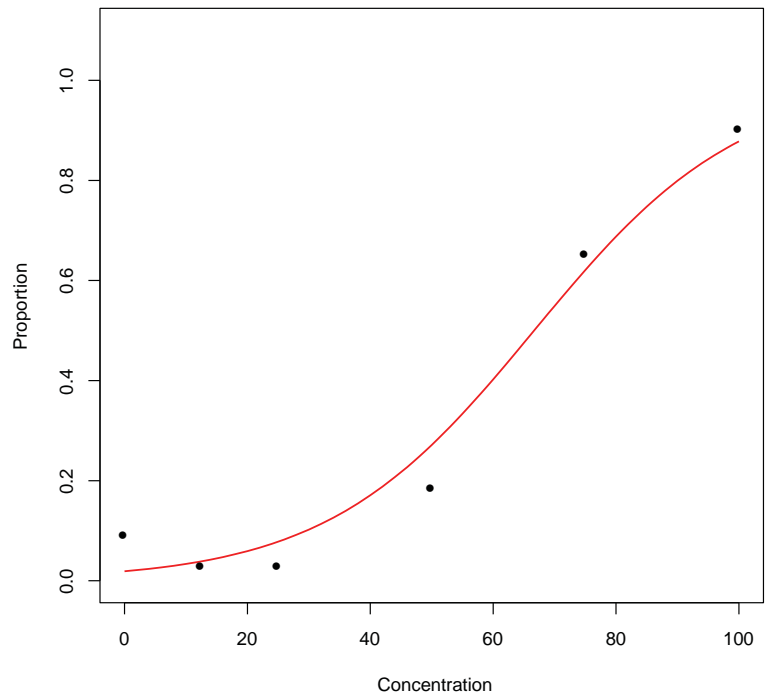

## Endrin

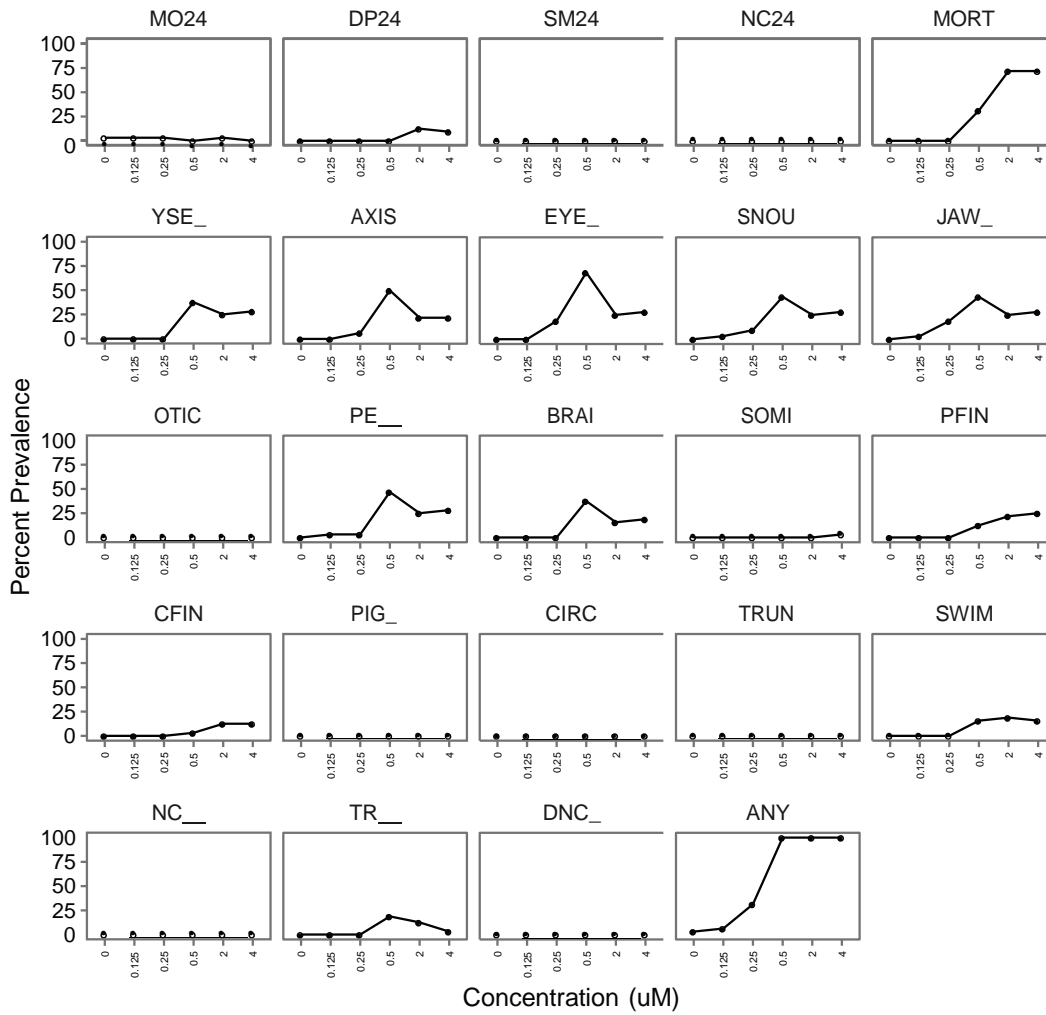

### Model Output:

Call:  
`glm(formula = ANY ~ CONC_log, family = binomial("logit"), data = logit_df)`

Deviance Residuals:  
 Min 1Q Median 3Q Max  
 -0.9689 -0.3515 0.0000 0.0002 3.2445

Coefficients:  
 Estimate Std. Error z value Pr(>|z|)  
 (Intercept) -5.2582 0.9312 -5.647 1.63e-08 \*\*\*  
 CONC\_log 48.9692 9.2158 5.314 1.07e-07 \*\*\*  
 ---  
 Signif. codes: 0 '\*\*\*' 0.001 '\*\*' 0.01 '\*' 0.05 '.' 0.1 ' ' 1

(Dispersion parameter for binomial family taken to be 1)

Null deviance: 262.64 on 191 degrees of freedom  
 Residual deviance: 68.28 on 190 degrees of freedom  
 AIC: 72.28

Number of Fisher Scoring iterations: 9

### EC Values:

|          | Concentration | SE.log     |
|----------|---------------|------------|
| p = 0.5: | 0.2804947     | 0.01554328 |
| p = 0.6: | 0.3051420     | 0.01712235 |
| p = 0.7: | 0.3325405     | 0.01948519 |
| p = 0.8: | 0.3667443     | 0.02298653 |

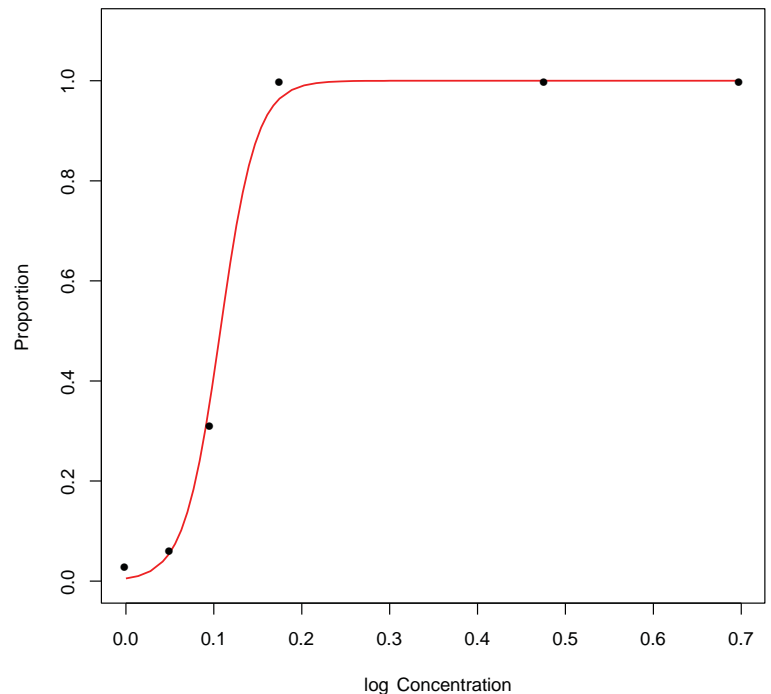

## Genistein

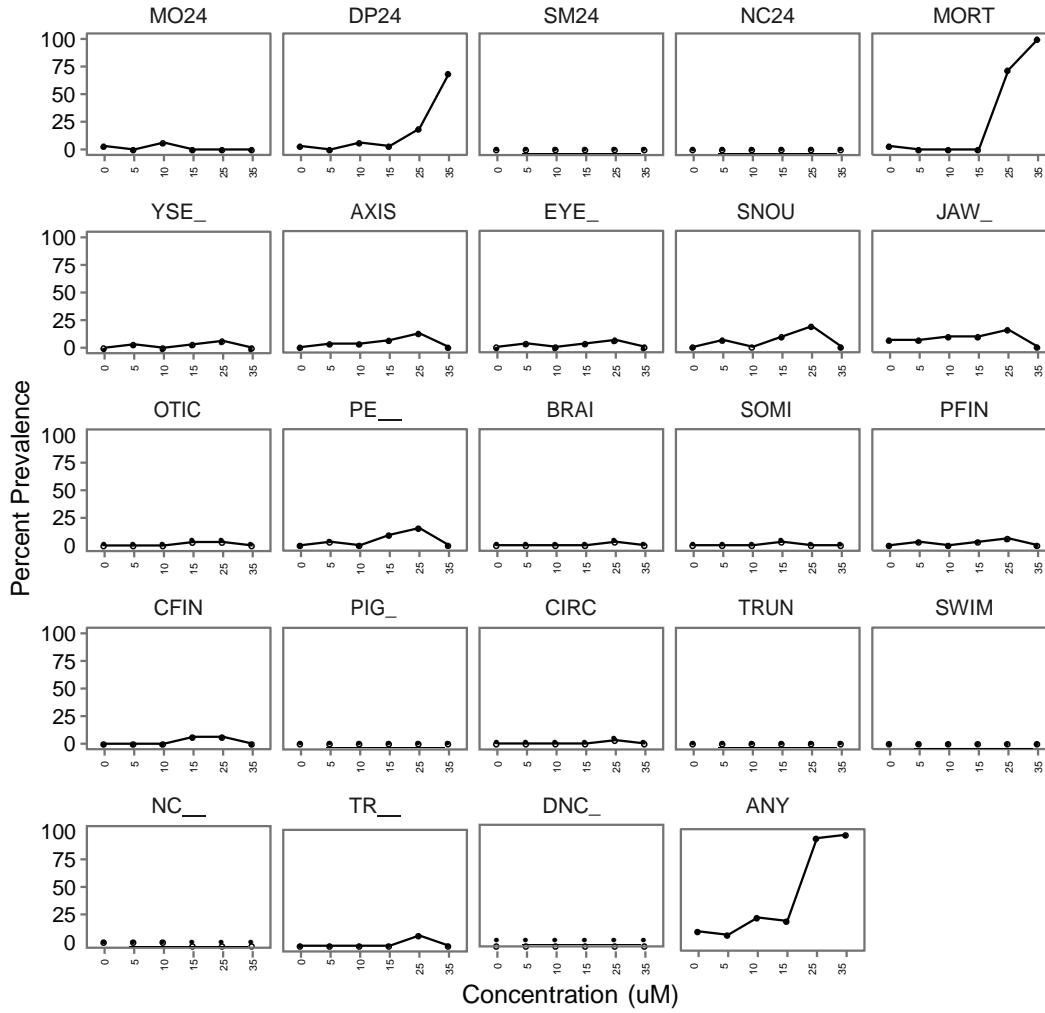

### Model Output:

Call:  
`glm(formula = ANY ~ CONC, family = binomial("logit"), data = logit_df)`

Deviance Residuals:  
 Min 1Q Median 3Q Max  
 -2.0022 -0.7185 -0.2722 0.5380 2.5746

Coefficients:  
 Estimate Std. Error z value Pr(>|z|)  
 (Intercept) -3.27736 0.44706 -7.331 2.29e-13 \*\*\*  
 CONC 0.20548 0.02813 7.304 2.80e-13 \*\*\*

---  
 Signif. codes: 0 '\*\*\*' 0.001 '\*\*' 0.01 '\*' 0.05 '.' 0.1 ' ' 1

(Dispersion parameter for binomial family taken to be 1)

Null deviance: 263.64 on 191 degrees of freedom  
 Residual deviance: 139.98 on 190 degrees of freedom  
 AIC: 143.98

Number of Fisher Scoring iterations: 5

### EC Values:

|          | Concentration | SE       |
|----------|---------------|----------|
| p = 0.5: | 15.94980      | 1.078416 |
| p = 0.6: | 17.92307      | 1.176533 |
| p = 0.7: | 20.07332      | 1.338486 |
| p = 0.8: | 22.69644      | 1.588446 |

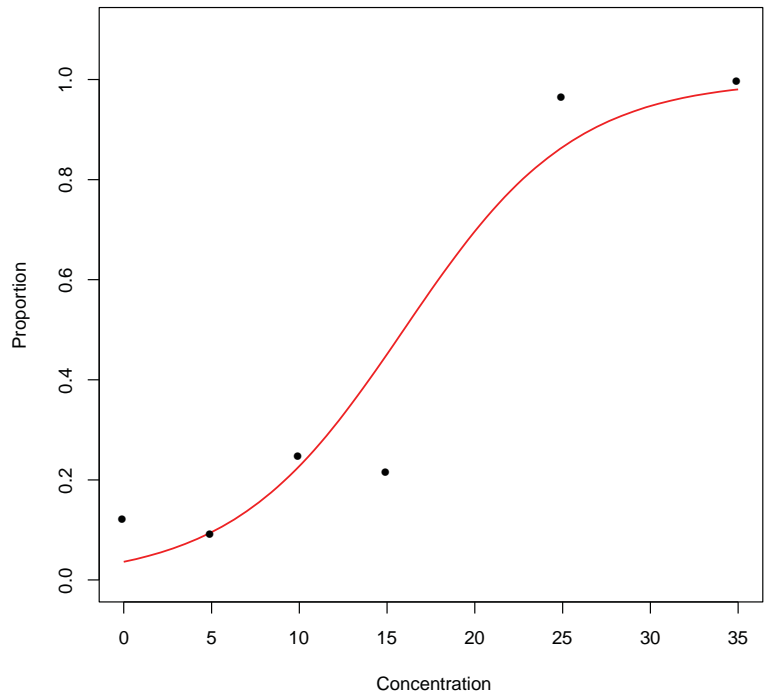

## haloperidol

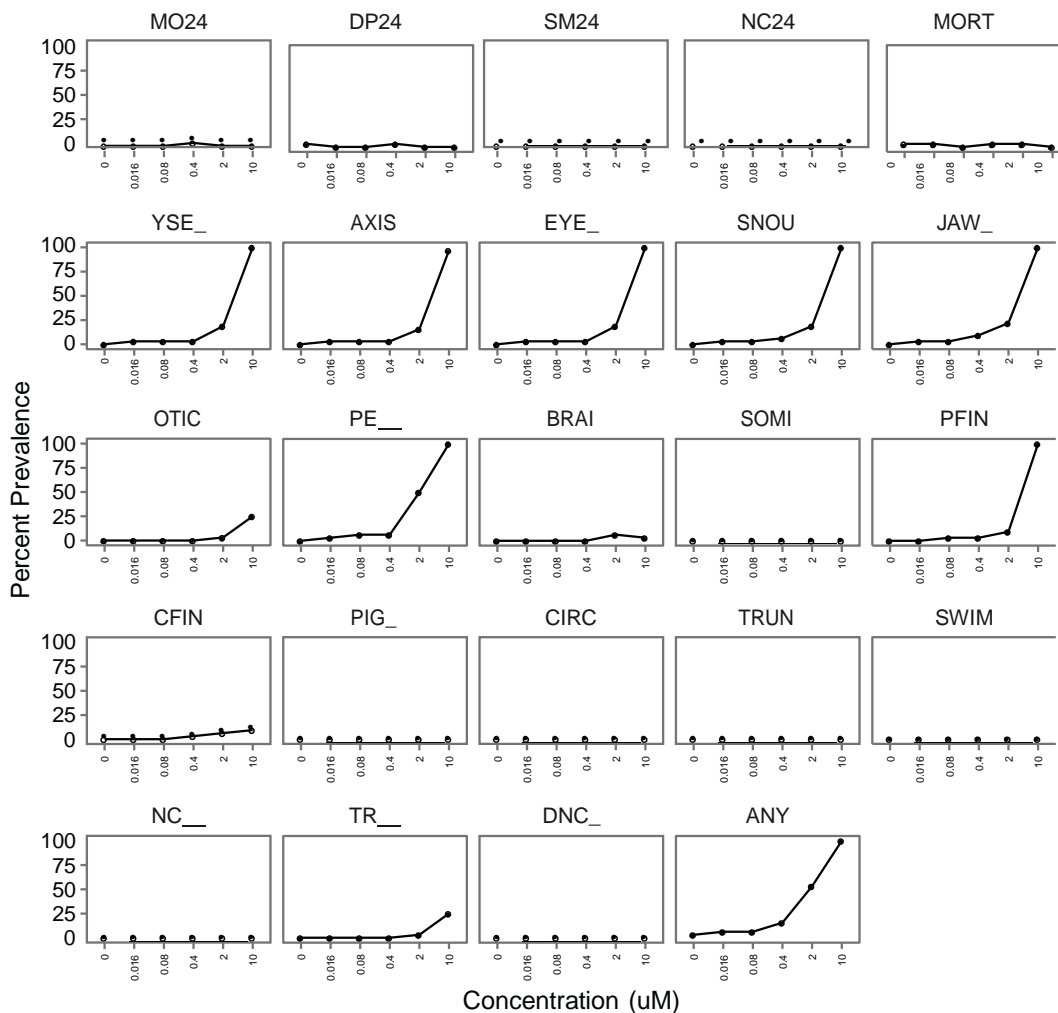

### Model Output:

Call:  
`glm(formula = ANY ~ CONC_log, family = binomial("logit"), data = logit_df)`

Deviance Residuals:  
 Min 1Q Median 3Q Max  
 -1.3082 -0.3543 -0.3243 0.1753 2.4561

Coefficients:  

|             | Estimate | Std. Error | z value | Pr(> z )     |
|-------------|----------|------------|---------|--------------|
| (Intercept) | -2.9660  | 0.3806     | -7.792  | 6.58e-15 *** |
| CONC_log    | 6.8501   | 1.0066     | 6.805   | 1.01e-11 *** |

---  
 Signif. codes: 0 '\*\*\*' 0.001 '\*\*' 0.01 '\*' 0.05 '.' 0.1 ' ' 1

(Dispersion parameter for binomial family taken to be 1)

Null deviance: 236.90 on 191 degrees of freedom  
 Residual deviance: 112.67 on 190 degrees of freedom  
 AIC: 116.67

Number of Fisher Scoring iterations: 6

### EC Values:

|          | Concentration | SE.log    |
|----------|---------------|-----------|
| p = 0.5: | 1.710062      | 0.1004594 |
| p = 0.6: | 2.105777      | 0.1132710 |
| p = 0.7: | 2.603049      | 0.1302349 |
| p = 0.8: | 3.318713      | 0.1539999 |

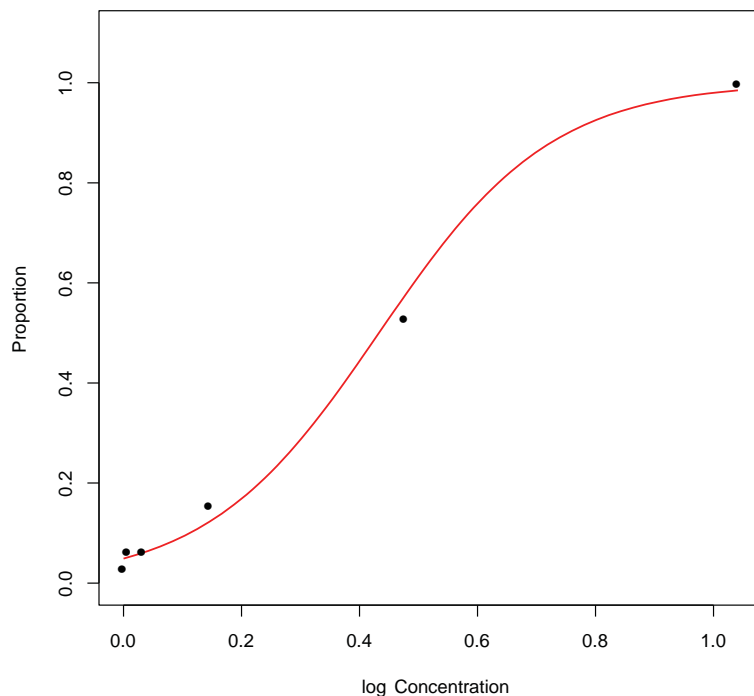

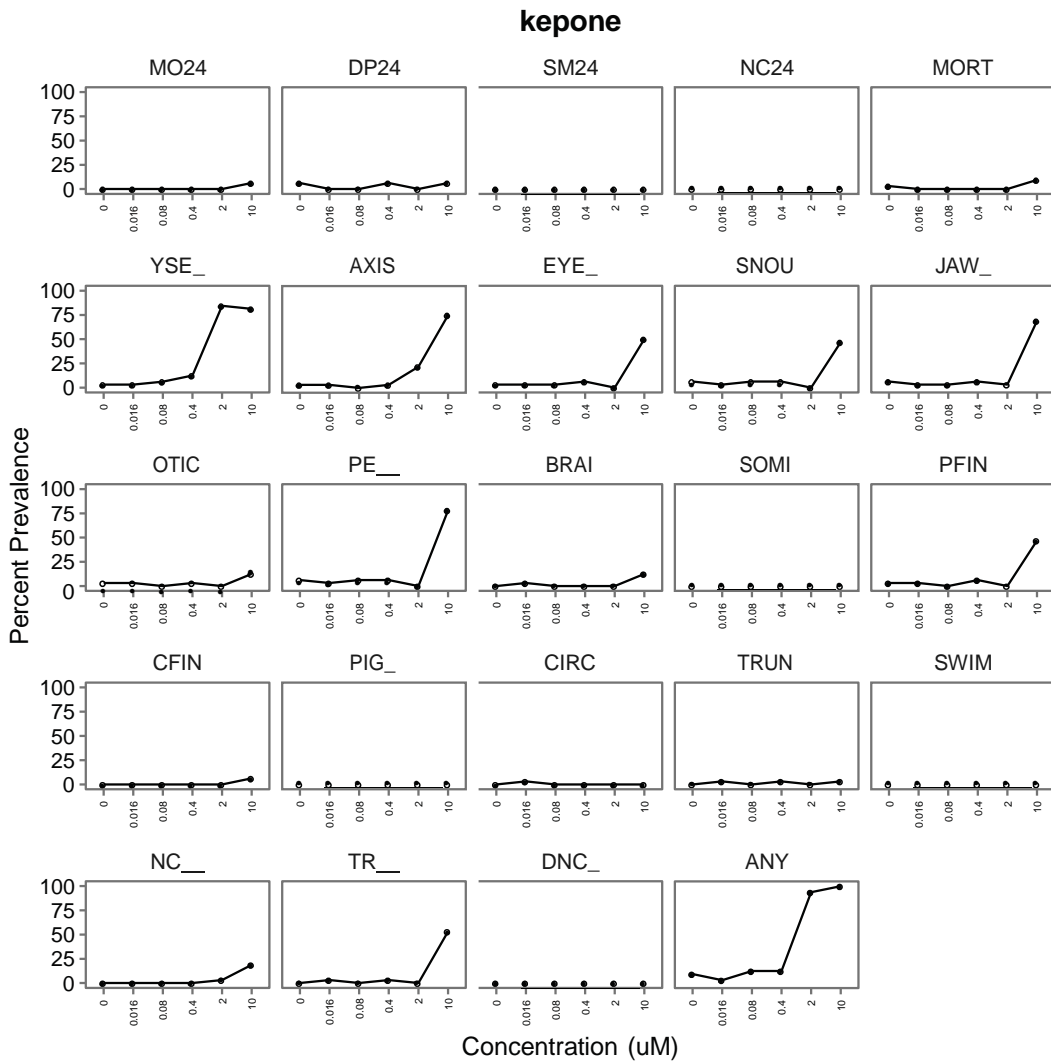

## Model Output:

Call:  
`glm(formula = ANY ~ CONC_log, family = binomial("logit"), data = logit_df)`

Deviance Residuals:  
 Min 1Q Median 3Q Max  
 -2.21041 -0.39247 -0.32852 0.01963 2.42748

Coefficients:  

|             | Estimate | Std. Error | z value | Pr(> z )     |
|-------------|----------|------------|---------|--------------|
| (Intercept) | -2.8924  | 0.3722     | -7.770  | 7.84e-15 *** |
| CONC_log    | 10.9917  | 1.6290     | 6.748   | 1.50e-11 *** |

---  
 Signif. codes: 0 '\*\*\*' 0.001 '\*\*' 0.01 '\*' 0.05 '.' 0.1 ' ' 1

(Dispersion parameter for binomial family taken to be 1)

Null deviance: 255.995 on 191 degrees of freedom  
 Residual deviance: 96.431 on 190 degrees of freedom  
 AIC: 100.43

Number of Fisher Scoring iterations: 7

## EC Values:

|          | Concentration | SE.log     |
|----------|---------------|------------|
| p = 0.5: | 0.8329025     | 0.07020508 |
| p = 0.6: | 0.9953889     | 0.07831717 |
| p = 0.7: | 1.1888922     | 0.08871710 |
| p = 0.8: | 1.4505350     | 0.10301181 |

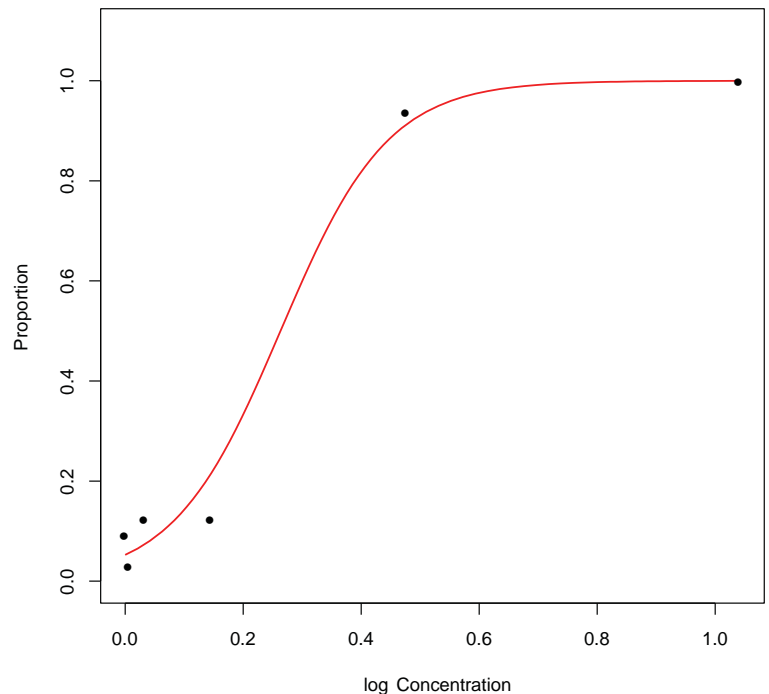



## Pentachlorophenol

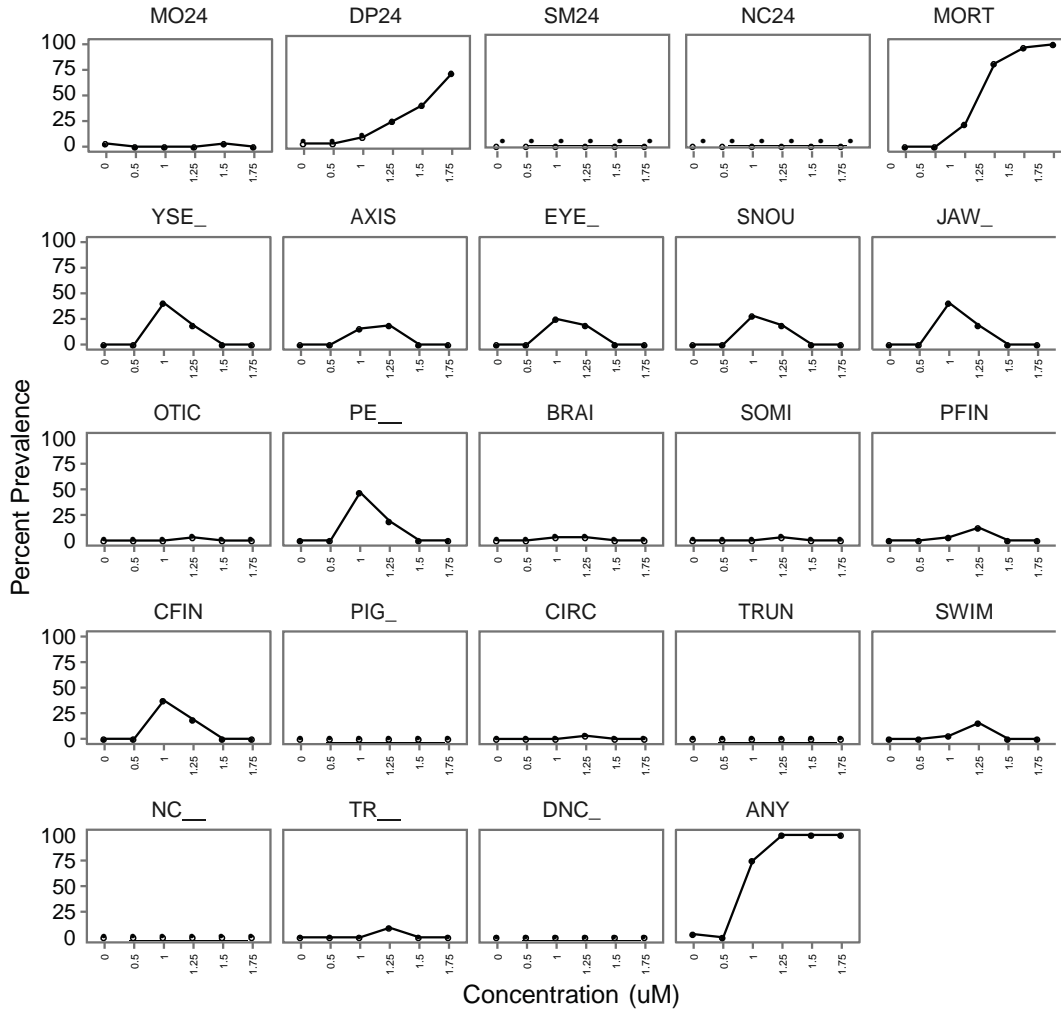

### Model Output:

Call:  
`glm(formula = ANY ~ CONC, family = binomial("logit"), data = logit_df)`

Deviance Residuals:  
 Min 1Q Median 3Q Max  
 -1.7269 -0.0329 0.0286 0.2531 3.8783

Coefficients:  

|             | Estimate | Std. Error | z value | Pr(> z )     |
|-------------|----------|------------|---------|--------------|
| (Intercept) | -7.520   | 1.523      | -4.938  | 7.87e-07 *** |
| CONC        | 8.756    | 1.547      | 5.660   | 1.52e-08 *** |

Signif. codes: 0 '\*\*\*' 0.001 '\*\*' 0.01 '\*' 0.05 '.' 0.1 ' ' 1

(Dispersion parameter for binomial family taken to be 1)

Null deviance: 253.00 on 191 degrees of freedom  
 Residual deviance: 56.19 on 190 degrees of freedom  
 AIC: 60.19

Number of Fisher Scoring iterations: 7

### EC Values:

|          | Concentration | SE         |
|----------|---------------|------------|
| p = 0.5: | 0.8588398     | 0.04402178 |
| p = 0.6: | 0.9051472     | 0.04147522 |
| p = 0.7: | 0.9556081     | 0.04043983 |
| p = 0.8: | 1.0171659     | 0.04179931 |

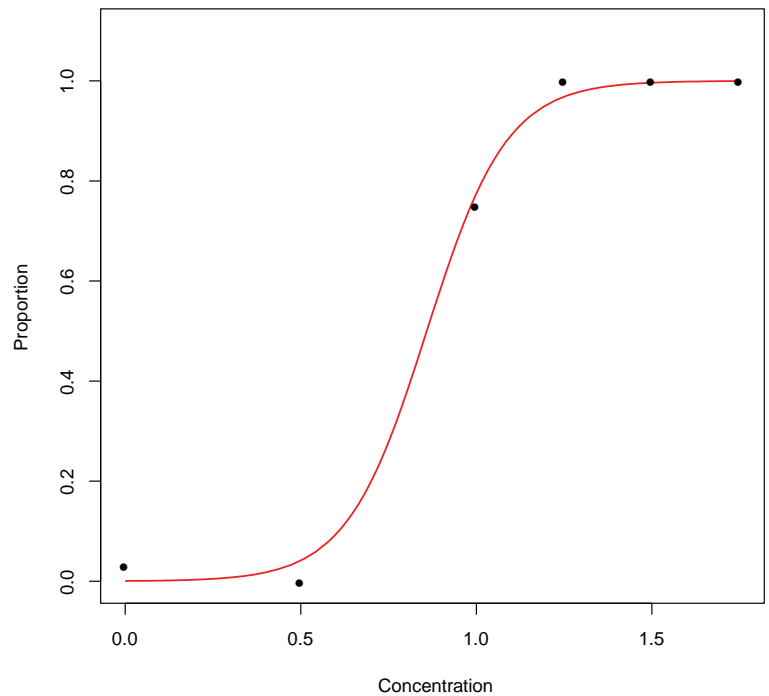

## Perfluorooctanesulfonic\_acid

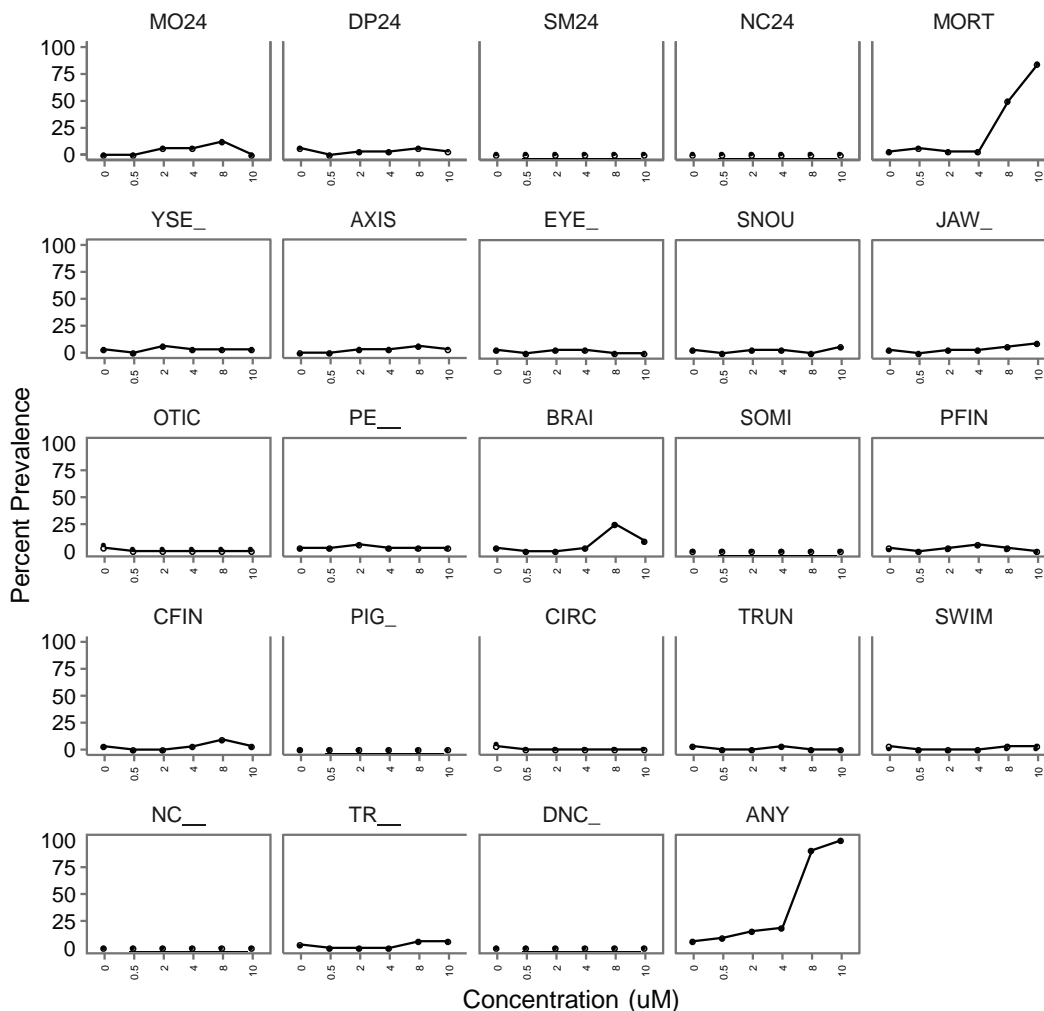

### Model Output:

Call:  
`glm(formula = ANY ~ CONC_log, family = binomial("logit"), data = logit_df)`

Deviance Residuals:  
 Min 1Q Median 3Q Max  
 -1.8455 -0.6369 -0.1497 0.4924 2.9992

Coefficients:  

|             | Estimate | Std. Error | z value | Pr(> z )     |
|-------------|----------|------------|---------|--------------|
| (Intercept) | -4.4864  | 0.6522     | -6.879  | 6.01e-12 *** |
| CONC_log    | 6.2754   | 0.8555     | 7.336   | 2.21e-13 *** |

---  
 Signif. codes: 0 '\*\*\*' 0.001 '\*\*' 0.01 '\*' 0.05 '.' 0.1 ' ' 1

(Dispersion parameter for binomial family taken to be 1)

Null deviance: 258.60 on 191 degrees of freedom  
 Residual deviance: 141.07 on 190 degrees of freedom  
 AIC: 145.07

Number of Fisher Scoring iterations: 5

### EC Values:

|          | Concentration | SE.log     |
|----------|---------------|------------|
| p = 0.5: | 4.187089      | 0.08110138 |
| p = 0.6: | 5.019158      | 0.08340946 |
| p = 0.7: | 6.078532      | 0.09185229 |
| p = 0.8: | 7.626487      | 0.10863450 |

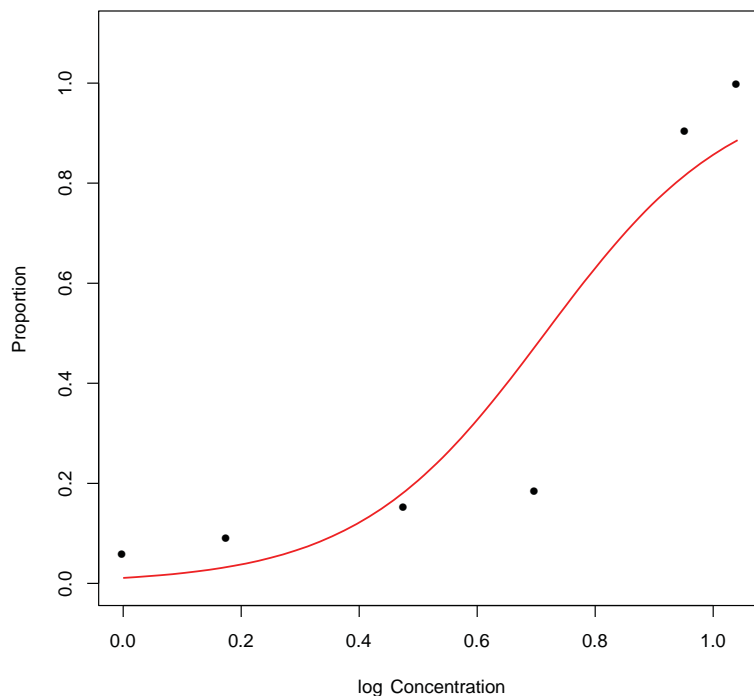

## Propiconazole

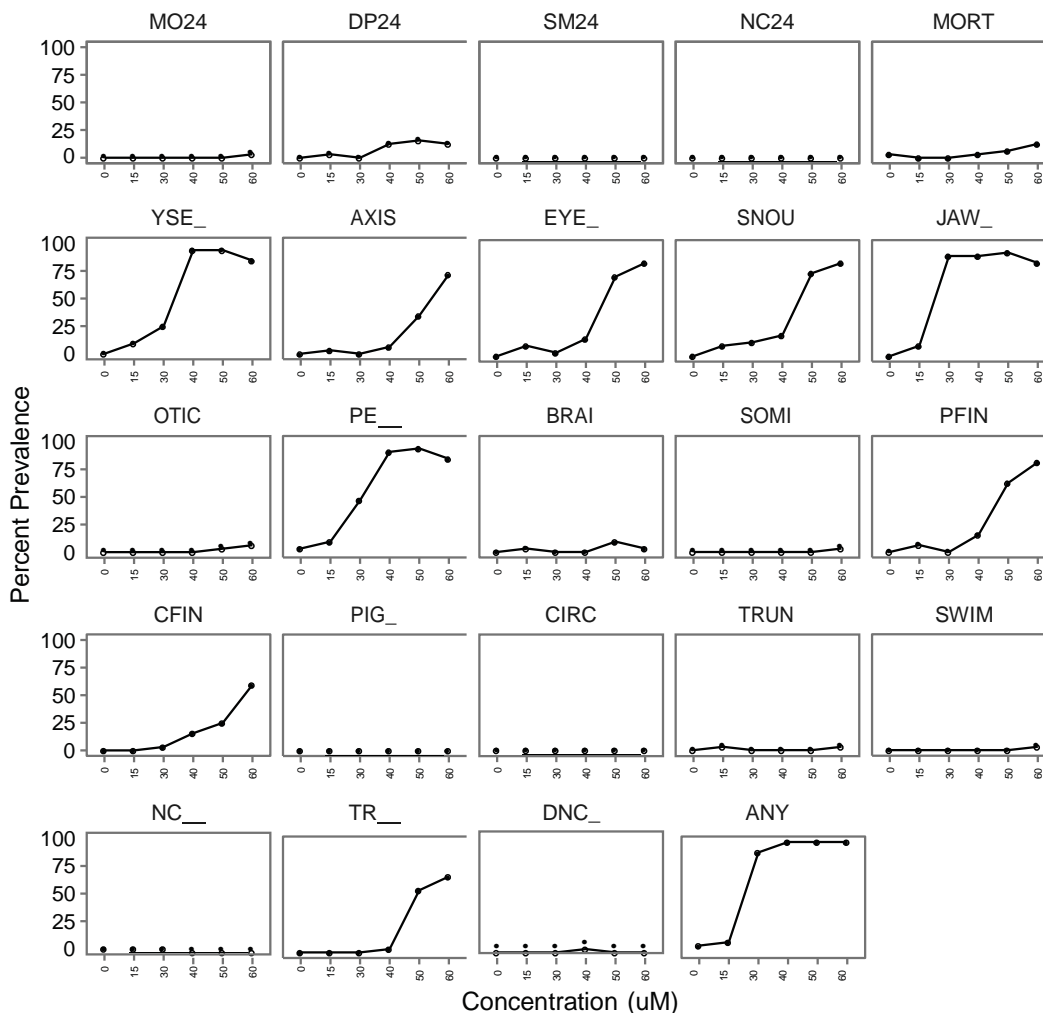

### Model Output:

Call:  
`glm(formula = ANY ~ CONC_log, family = binomial("logit"), data = logit_df)`

Deviance Residuals:  
 Min 1Q Median 3Q Max  
 -1.9077 -0.0086 0.2611 0.3771 4.5197

Coefficients:  

|             | Estimate | Std. Error | z value | Pr(> z )     |
|-------------|----------|------------|---------|--------------|
| (Intercept) | -10.214  | 1.833      | -5.571  | 2.54e-08 *** |
| CONC_log    | 7.950    | 1.300      | 6.118   | 9.49e-10 *** |

Signif. codes: 0 '\*\*\*' 0.001 '\*\*' 0.01 '\*' 0.05 '.' 0.1 ' ' 1

(Dispersion parameter for binomial family taken to be 1)

Null deviance: 241.55 on 191 degrees of freedom  
 Residual deviance: 100.88 on 190 degrees of freedom  
 AIC: 104.88

Number of Fisher Scoring iterations: 7

### EC Values:

|          | Concentration | SE.log     |
|----------|---------------|------------|
| p = 0.5: | 18.26342      | 0.08914680 |
| p = 0.6: | 20.66380      | 0.08080198 |
| p = 0.7: | 23.62127      | 0.07705336 |
| p = 0.8: | 27.78113      | 0.08089292 |

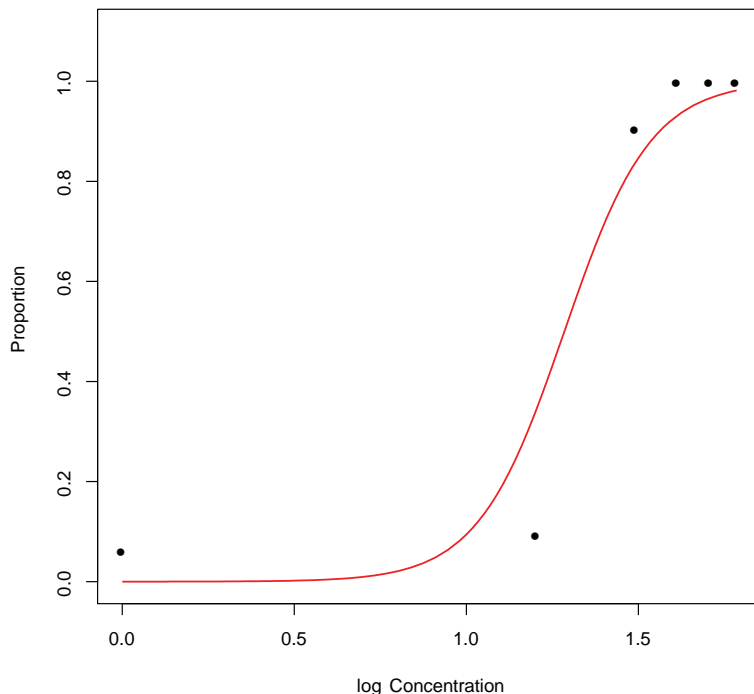

## Propylparaben

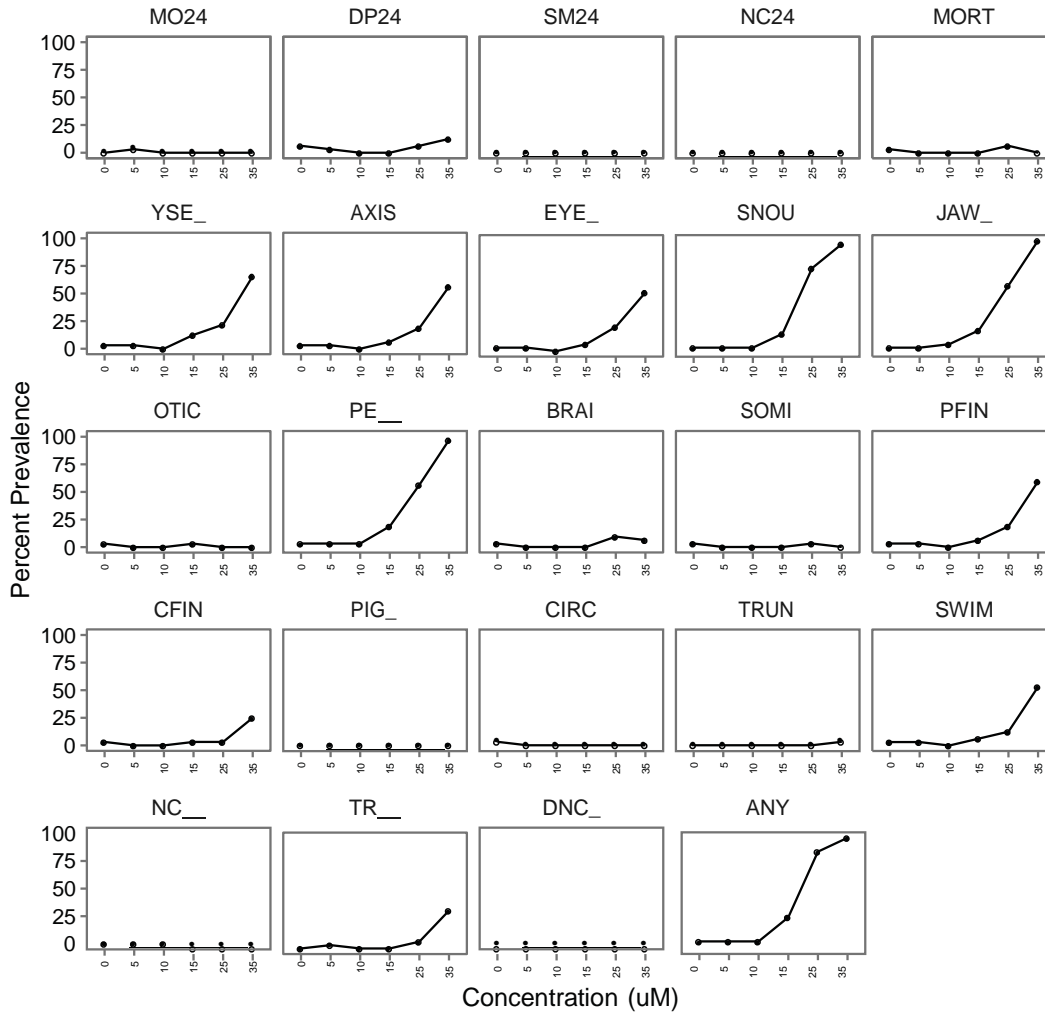

### Model Output:

Call:  
`glm(formula = ANY ~ CONC_log, family = binomial("logit"), data = logit_df)`

Deviance Residuals:  
 Min 1Q Median 3Q Max  
 -1.7005 -0.6783 -0.0212 0.4730 4.0997

Coefficients:  
 Estimate Std. Error z value Pr(>|z|)  
 (Intercept) -8.404 1.272 -6.606 3.95e-11 \*\*\*  
 CONC\_log 6.771 1.011 6.701 2.08e-11 \*\*\*  
 ---  
 Signif. codes: 0 '\*\*\*' 0.001 '\*\*' 0.01 '\*' 0.05 '.' 0.1 ' ' 1

(Dispersion parameter for binomial family taken to be 1)

Null deviance: 256.91 on 191 degrees of freedom  
 Residual deviance: 144.15 on 190 degrees of freedom  
 AIC: 148.15

Number of Fisher Scoring iterations: 6

### EC Values:

|          | Concentration | SE.log     |
|----------|---------------|------------|
| p = 0.5: | 16.42256      | 0.07319316 |
| p = 0.6: | 18.99837      | 0.07625754 |
| p = 0.7: | 22.24067      | 0.08604209 |
| p = 0.8: | 26.91596      | 0.10460158 |

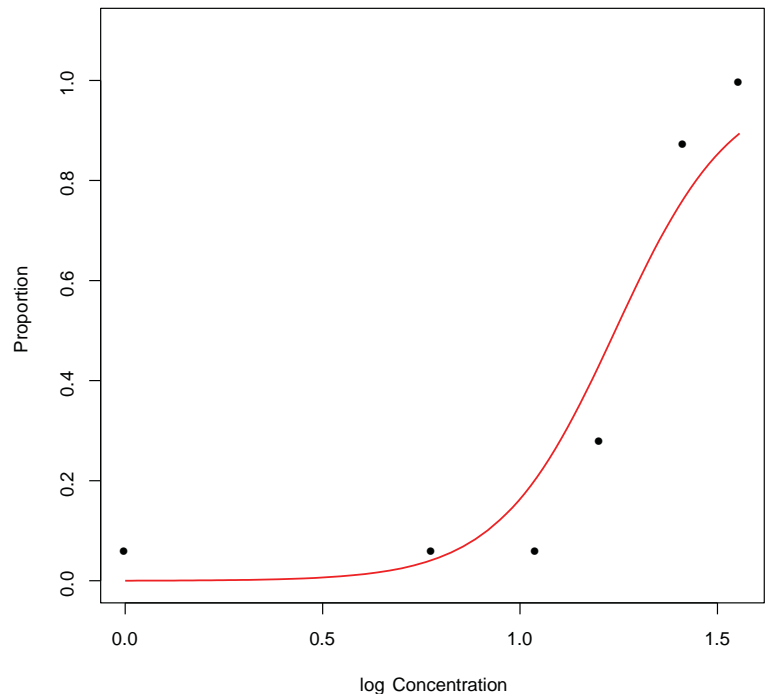

# Raloxifene\_hydrochloride

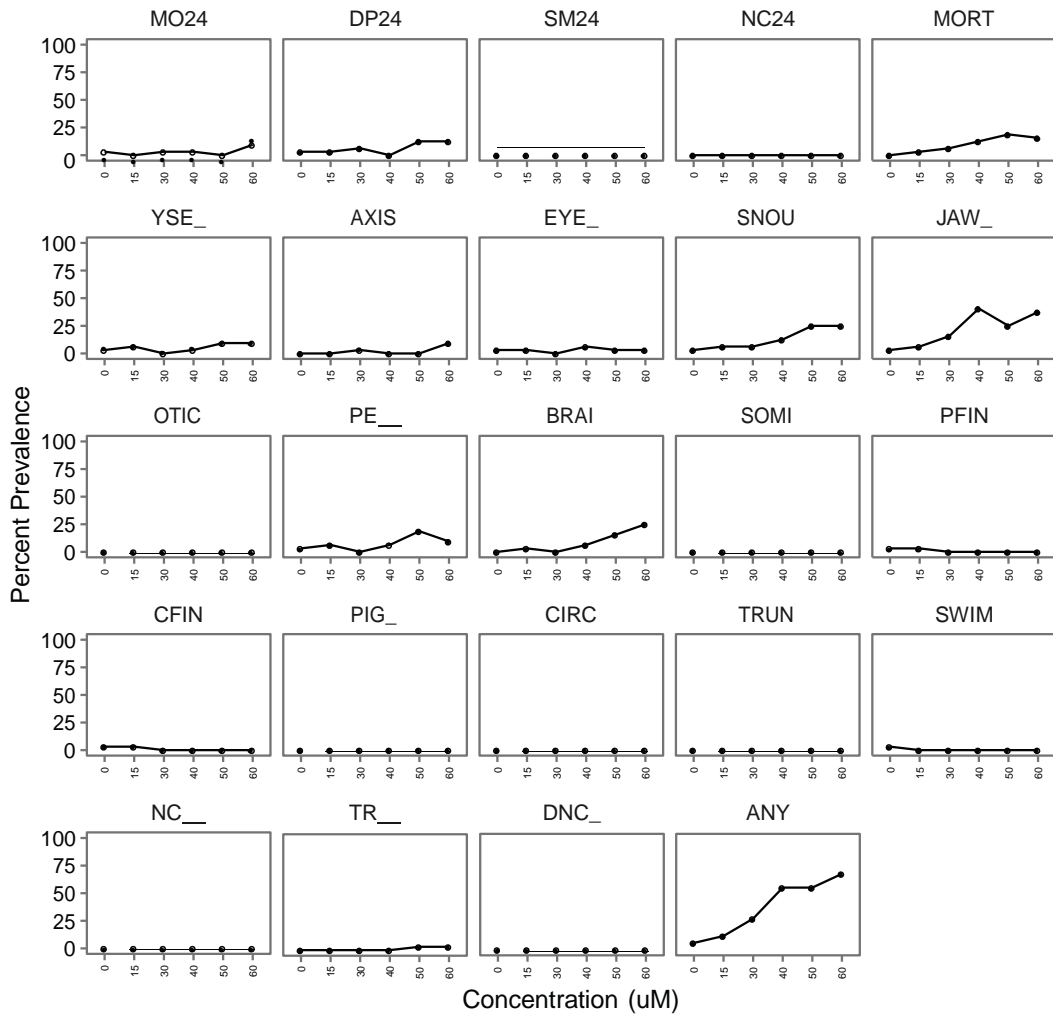

**Precipitation at 60 uM  
EC set to 50 uM**

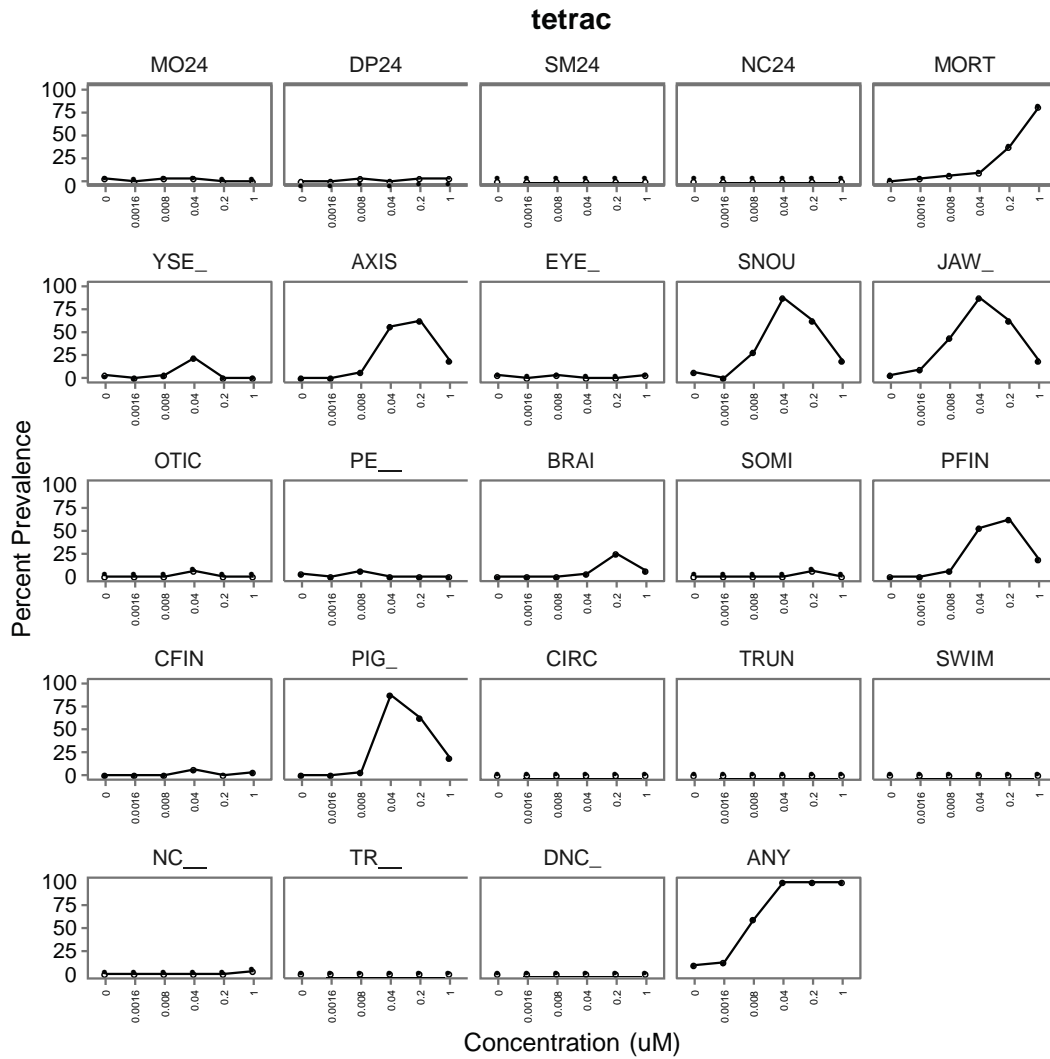

### Model Output:

Call:  
`glm(formula = ANY ~ CONC_log, family = binomial("logit"), data = logit_df)`

Deviance Residuals:  
 Min 1Q Median 3Q Max  
 -1.33781 -0.41845 0.00000 0.00523 2.22666

Coefficients:  
 Estimate Std. Error z value Pr(>|z|)  
 (Intercept) -2.3915 0.4545 -5.262 1.43e-07 \*\*\*  
 CONC\_log 797.8440 174.7635 4.565 4.99e-06 \*\*\*  
 ---  
 Signif. codes: 0 '\*\*\*' 0.001 '\*\*' 0.01 '\*' 0.05 '.' 0.1 ' ' 1

(Dispersion parameter for binomial family taken to be 1)

Null deviance: 251.908 on 191 degrees of freedom  
 Residual deviance: 87.339 on 190 degrees of freedom  
 AIC: 91.339

Number of Fisher Scoring iterations: 12

### EC Values:

|          | Concentration | SE.log       |
|----------|---------------|--------------|
| p = 0.5: | 0.006925638   | 0.0008944543 |
| p = 0.6: | 0.008104608   | 0.0010476304 |
| p = 0.7: | 0.009390896   | 0.0012536536 |
| p = 0.8: | 0.010962274   | 0.0015368660 |

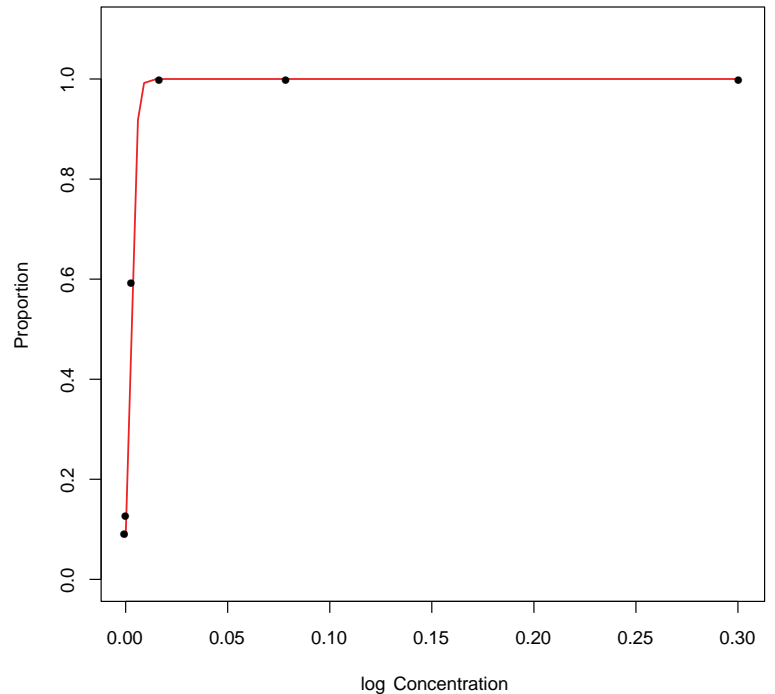

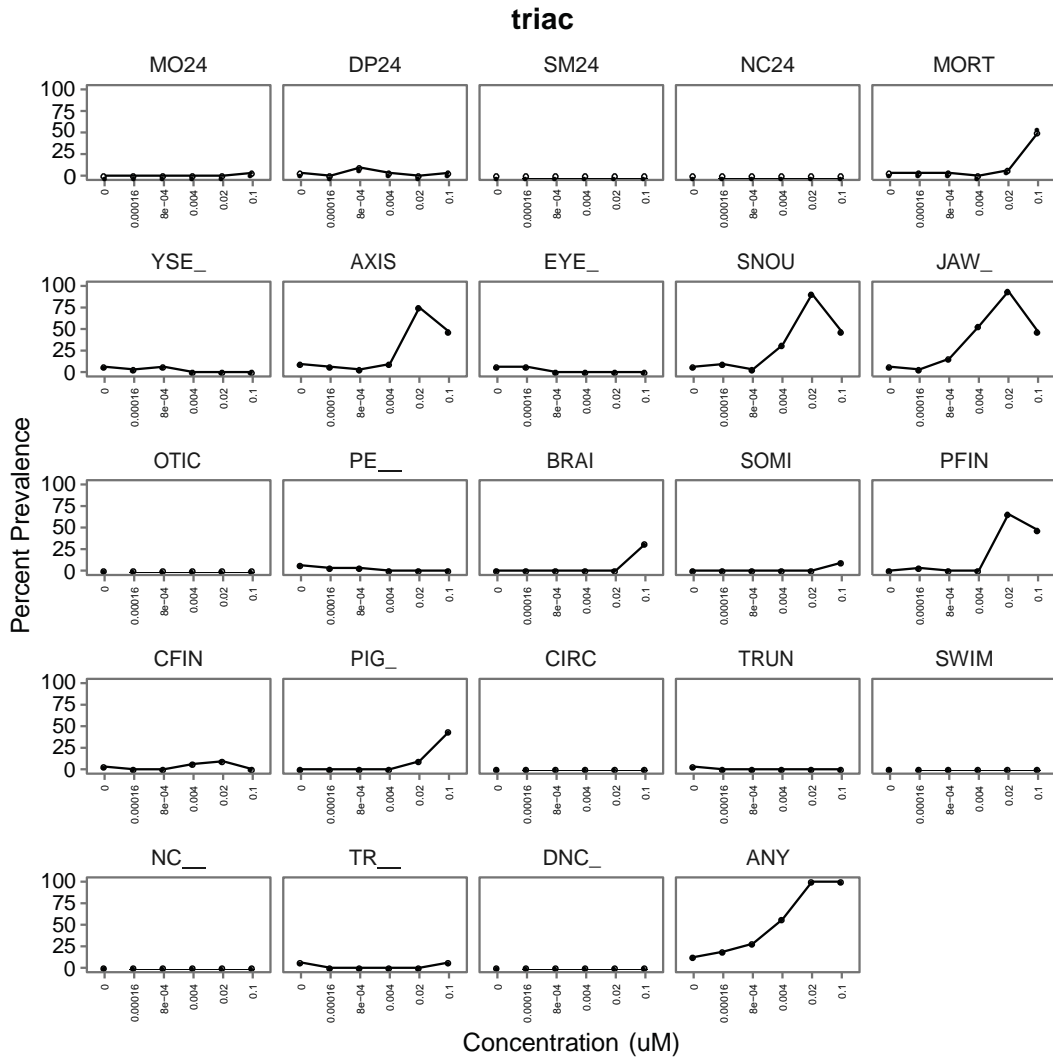

**Model Output:**

Call:  
`glm(formula = ANY ~ CONC_log, family = binomial("logit"), data = logit_df)`

Deviance Residuals:  
 Min 1Q Median 3Q Max  
 -1.30825 -0.63217 0.00000 0.02898 1.88198

Coefficients:  

|             | Estimate  | Std. Error | z value | Pr(> z )     |
|-------------|-----------|------------|---------|--------------|
| (Intercept) | -1.5844   | 0.2812     | -5.635  | 1.75e-08 *** |
| CONC_log    | 1088.3107 | 267.2499   | 4.072   | 4.66e-05 *** |

---  
 Signif. codes: 0 '\*\*\*' 0.001 '\*\*' 0.01 '\*' 0.05 '.' 0.1 ' ' 1

(Dispersion parameter for binomial family taken to be 1)

Null deviance: 265.65 on 191 degrees of freedom  
 Residual deviance: 137.89 on 190 degrees of freedom  
 AIC: 141.89

Number of Fisher Scoring iterations: 9

**EC Values:**

|          | Concentration | SE.log       |
|----------|---------------|--------------|
| p = 0.5: | 0.003357774   | 0.0006154304 |
| p = 0.6: | 0.004218884   | 0.0007765824 |
| p = 0.7: | 0.005158071   | 0.0009740526 |
| p = 0.8: | 0.006304985   | 0.0012302781 |

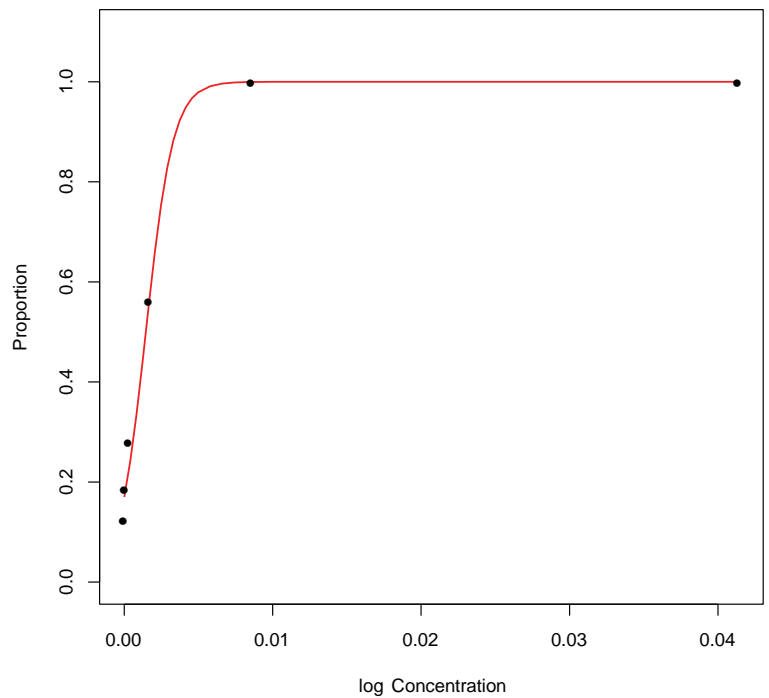

### 335\_triiodothyronine

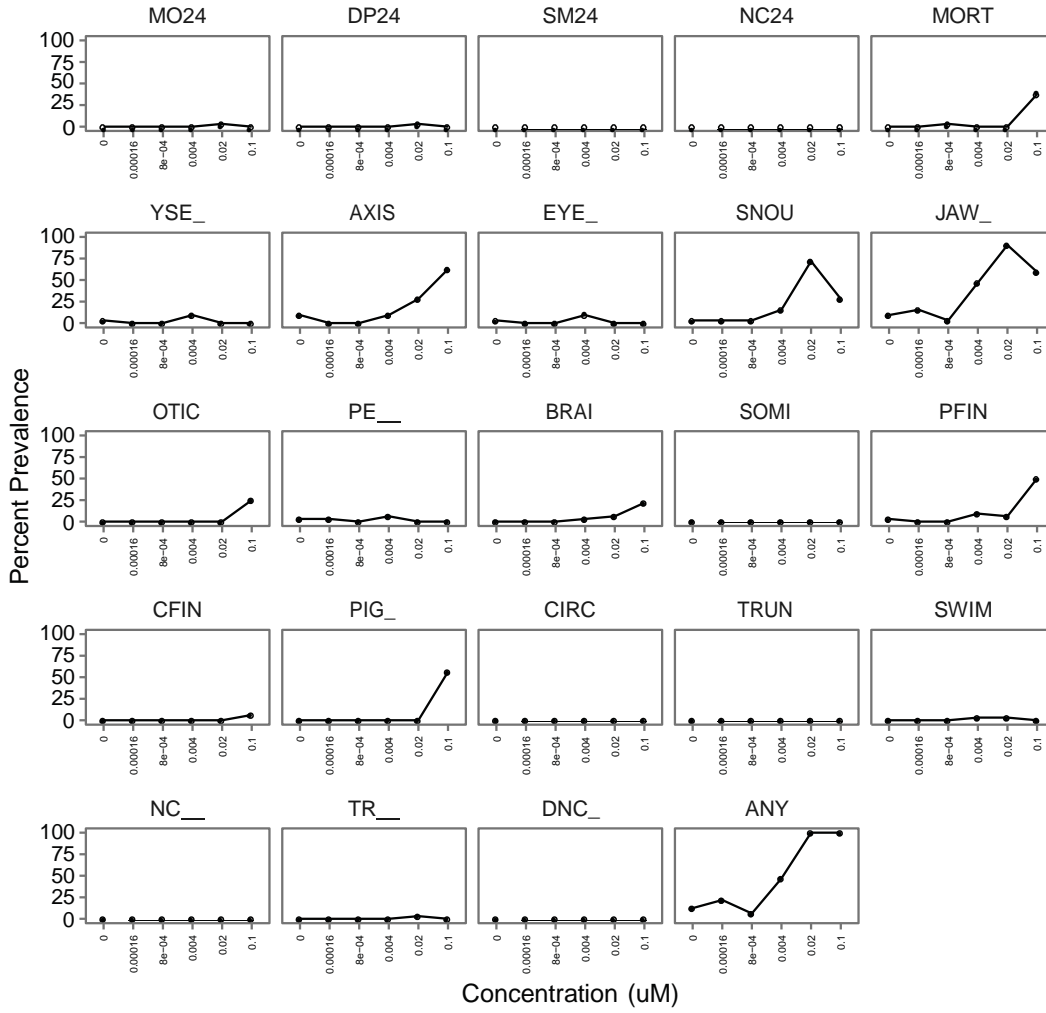

### Model Output:

Call:  
`glm(formula = ANY ~ CONC_log, family = binomial("logit"), data = logit_df)`

Deviance Residuals:  
 Min 1Q Median 3Q Max  
 -1.10392 -0.52880 -0.51132 0.04428 2.04905

Coefficients:  
 Estimate Std. Error z value Pr(>|z|)  
 (Intercept) -1.9686 0.3144 -6.261 3.83e-10 \*\*\*  
 CONC\_log 1034.3437 268.4446 3.853 0.000117 \*\*\*  
 ---  
 Signif. codes: 0 '\*\*\*' 0.001 '\*\*' 0.01 '\*' 0.05 '.' 0.1 ' ' 1

(Dispersion parameter for binomial family taken to be 1)

Null deviance: 265.84 on 191 degrees of freedom  
 Residual deviance: 122.04 on 190 degrees of freedom  
 AIC: 126.04

Number of Fisher Scoring iterations: 9

### EC Values:

|          | Concentration | SE.log      |
|----------|---------------|-------------|
| p = 0.5: | 0.004391939   | 0.000824545 |
| p = 0.6: | 0.005298931   | 0.001020142 |
| p = 0.7: | 0.006288207   | 0.001248666 |
| p = 0.8: | 0.007496354   | 0.001539073 |

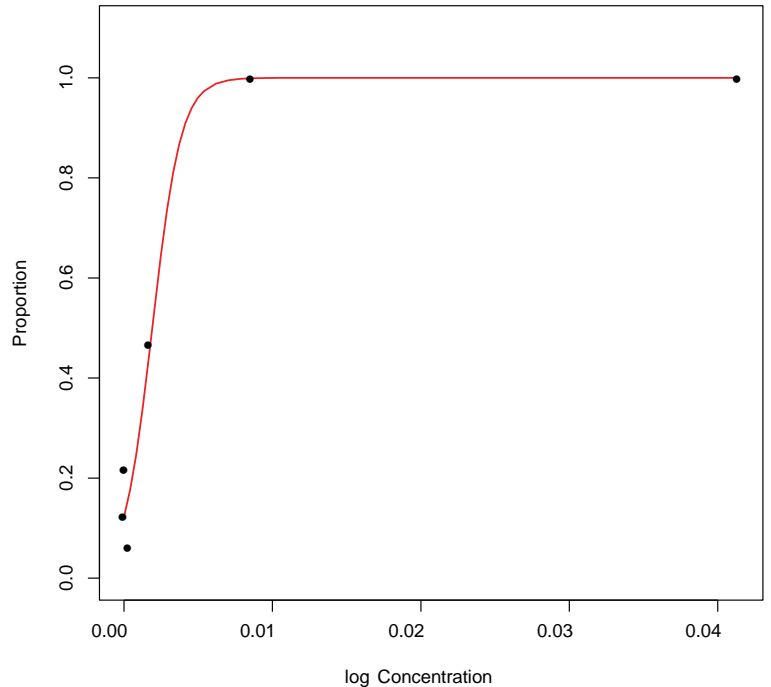



### Vinclozolin

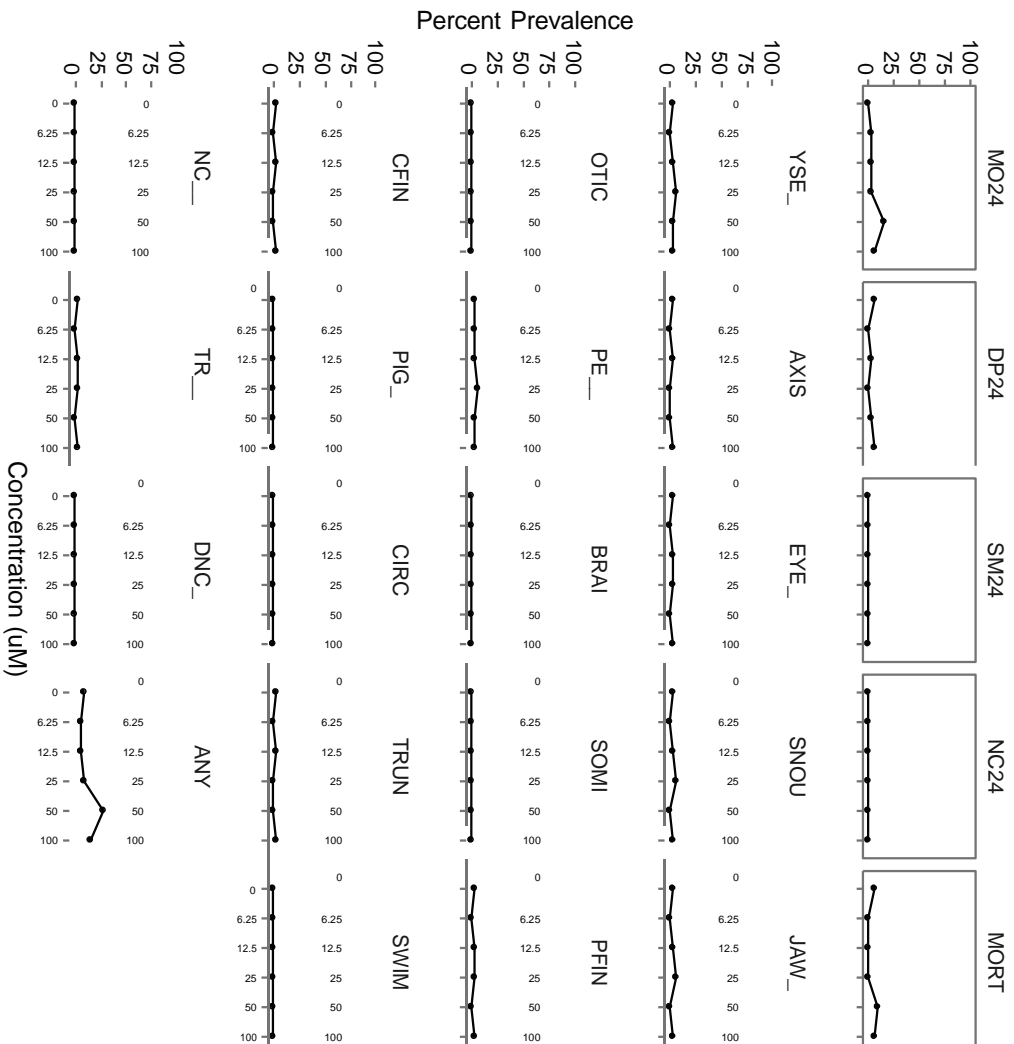

**No significant mortality or malformations at 100 uM  
EC set to 50 uM**

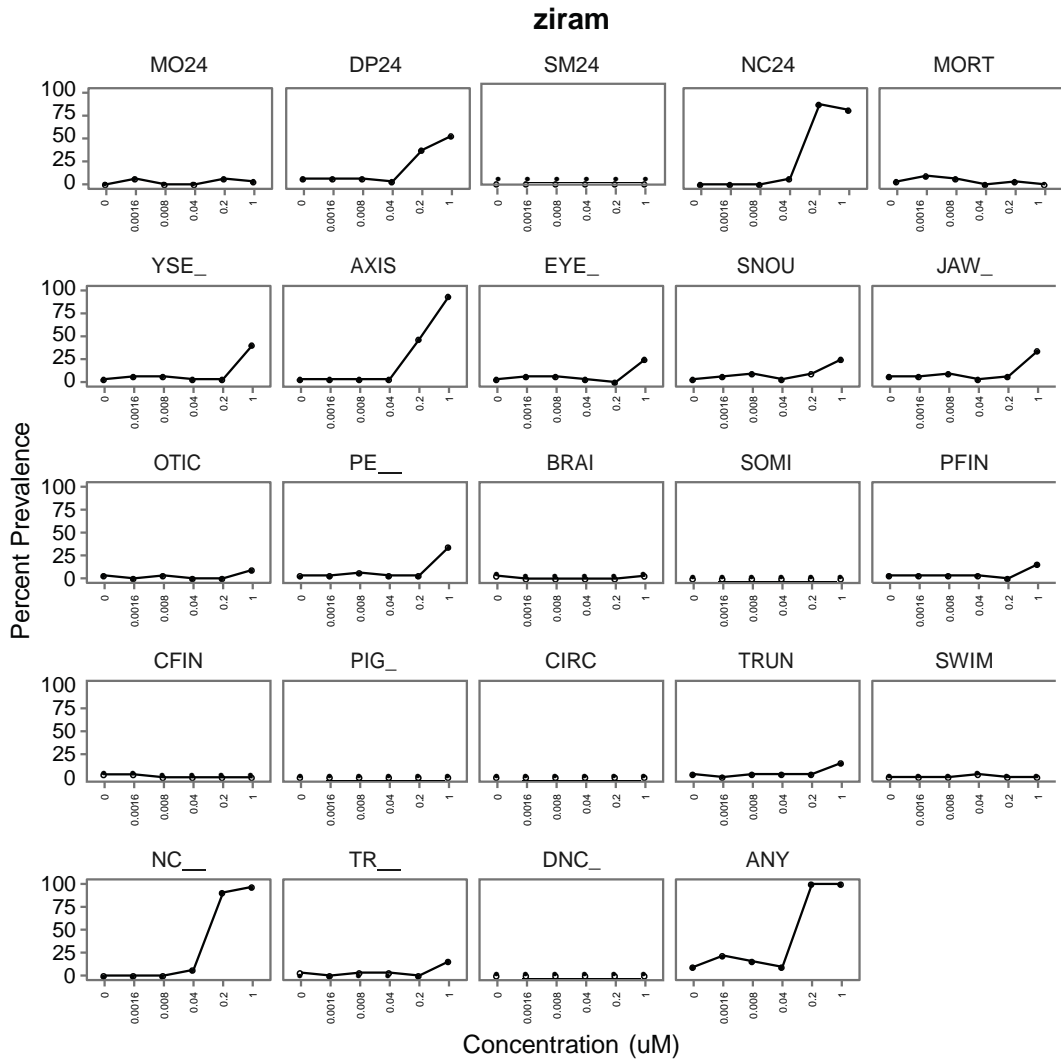

**Model Output:**

Call:  
`glm(formula = ANY ~ CONC_log, family = binomial("logit"), data = logit_df)`

Deviance Residuals:  
 Min 1Q Median 3Q Max  
 -0.7892 -0.5156 -0.4602 0.2670 2.1436

Coefficients:  
 Estimate Std. Error z value Pr(>|z|)  
 (Intercept) -2.1917 0.2911 -7.529 5.13e-14 \*\*\*  
 CONC\_log 69.5629 12.8123 5.429 5.66e-08 \*\*\*  
 ---  
 Signif. codes: 0 '\*\*\*' 0.001 '\*\*' 0.01 '\*' 0.05 '.' 0.1 ' ' 1

(Dispersion parameter for binomial family taken to be 1)

Null deviance: 262.07 on 191 degrees of freedom  
 Residual deviance: 113.30 on 190 degrees of freedom  
 AIC: 117.3

Number of Fisher Scoring iterations: 8

**EC Values:**

|          | Concentration | SE.log     |
|----------|---------------|------------|
| p = 0.5: | 0.07524232    | 0.01153387 |
| p = 0.6: | 0.08977064    | 0.01342361 |
| p = 0.7: | 0.10582567    | 0.01568328 |
| p = 0.8: | 0.12573198    | 0.01861909 |

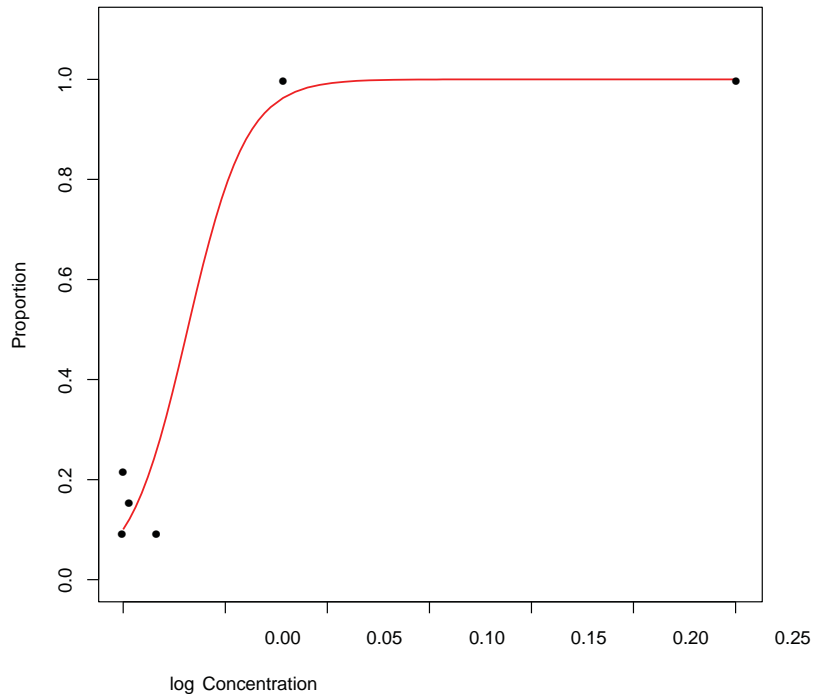

Supplement: NIHMS948507-supplement-3.pdf [file NIHMS948507-supplement-3.pdf]
